# Supplementary material for: The millimeter wave spectrum of aGg′ ethylene glycol: The quest for higher precision
Source: Royal Society of Chemistry journal article supplement (doi:10.1039/b304566h), 2003-01-01
Supplement: supplem.pdf [file supplem.pdf]

## aGg'-Ethyleneglycol

The first column gives the lines number; 1 - 107 are from the previous study, 108 - 667 from the present one.

The following four columns state the upper state quantum numbers J', Ka', Kc' and the vibrational identifier v'.

After the minus sign appear the lower state quantum numbers J'', Ka'', Kc'' and v''.

The last three columns provide the experimental frequency, the uncertainty (1 sigma), and the residual between observed and calculated frequency - all in units of MHz.

The last column gives the weight for overlapping lines.

In the present case, this is the spin-statistical weight for prolate and oblate paired transitions with equal values for Ka and Kc, respectively.

| No. | J'Ka'Kc' | v' | - | J''Ka''Kc'' | v'' | frequency | unc.  | res.   | weight |
|-----|----------|----|---|-------------|-----|-----------|-------|--------|--------|
| 1:  | 5 4 2    | 1  | - | 5 4 1       | 0   | 6951.97   | 0.10  | -0.186 |        |
| 2:  | 3 3 1    | 1  | - | 3 3 0       | 0   | 6957.24   | 0.10  | -0.179 |        |
| 3:  | 4 4 1    | 1  | - | 4 4 0       | 0   | 6963.88   | 0.10  | -0.155 | 0.4375 |
| 4:  | 4 4 0    | 1  | - | 4 4 1       | 0   | 6963.88   | 0.10  | -0.155 | 0.5625 |
| 5:  | 5 3 2    | 1  | - | 5 3 3       | 0   | 7024.68   | 0.10  | -0.267 |        |
| 6:  | 2 2 0    | 1  | - | 2 2 1       | 0   | 7026.5    | 0.5   | -0.144 |        |
| 7:  | 7 3 4    | 1  | - | 7 3 5       | 0   | 7528.18   | 0.10  | -0.033 |        |
| 8:  | 5 1 4    | 0  | - | 5 1 5       | 1   | 7600.69   | 0.10  | 0.265  |        |
| 9:  | 1 1 0    | 1  | - | 1 1 1       | 0   | 7925.494  | 0.004 | -0.002 |        |
| 10: | 4 2 2    | 1  | - | 4 2 3       | 0   | 7948.88   | 0.10  | -0.212 |        |
| 11: | 8 3 5    | 1  | - | 8 3 6       | 0   | 8217.69   | 0.10  | -0.049 |        |
| 12: | 8 1 8    | 1  | - | 8 0 8       | 0   | 8603.52   | 0.10  | -0.259 |        |
| 13: | 5 2 3    | 1  | - | 5 2 4       | 0   | 9217.42   | 0.10  | -0.123 |        |
| 14: | 2 1 1    | 1  | - | 2 1 2       | 0   | 9852.141  | 0.004 | -0.001 |        |
| 15: | 2 0 2    | 1  | - | 1 1 1       | 1   | 10534.513 | 0.004 | -0.002 |        |
| 16: | 2 0 2    | 0  | - | 1 1 1       | 0   | 10551.877 | 0.004 | 0.000  |        |
| 17: | 1 1 0    | 0  | - | 1 0 1       | 0   | 10747.533 | 0.004 | 0.000  |        |
| 18: | 1 1 0    | 1  | - | 1 0 1       | 1   | 10754.257 | 0.004 | 0.000  |        |
| 19: | 5 1 5    | 1  | - | 4 2 2       | 1   | 11488.0   | 0.5   | -0.467 |        |
| 20: | 5 1 5    | 1  | - | 5 0 5       | 0   | 11745.0   | 0.5   | -0.576 |        |
| 21: | 2 1 1    | 0  | - | 2 0 2       | 0   | 11785.804 | 0.004 | -0.000 |        |
| 22: | 2 1 1    | 1  | - | 2 0 2       | 1   | 11810.300 | 0.004 | 0.002  |        |
| 23: | 2 1 2    | 0  | - | 1 1 1       | 1   | 12492.671 | 0.004 | 0.000  |        |
| 24: | 3 1 2    | 1  | - | 3 1 3       | 0   | 12689.052 | 0.008 | -0.006 |        |
| 25: | 2 0 2    | 0  | - | 1 0 1       | 1   | 13380.638 | 0.004 | 0.000  |        |
| 26: | 3 1 2    | 0  | - | 3 0 3       | 0   | 13444.750 | 0.004 | -0.001 |        |
| 27: | 3 1 2    | 1  | - | 3 0 3       | 1   | 13571.455 | 0.004 | -0.001 |        |
| 28: | 1 1 0    | 0  | - | 0 0 0       | 1   | 13990.891 | 0.004 | -0.001 |        |
| 29: | 6 2 5    | 0  | - | 6 1 5       | 1   | 14336.54  | 0.10  | 0.146  |        |
| 30: | 7 2 5    | 1  | - | 7 2 6       | 0   | 14337.37  | 0.10  | -0.041 |        |
| 31: | 2 1 1    | 0  | - | 1 1 0       | 1   | 14412.184 | 0.004 | -0.001 |        |
| 32: | 4 1 3    | 1  | - | 3 2 2       | 1   | 14678.1   | 0.5   | 0.449  |        |
| 33: | 4 1 3    | 0  | - | 3 2 2       | 0   | 14706.2   | 0.5   | 0.088  |        |
| 34: | 4 1 3    | 1  | - | 4 0 4       | 1   | 15809.0   | 0.5   | 0.659  |        |
| 35: | 2 1 2    | 1  | - | 2 0 2       | 0   | 15829.733 | 0.004 | -0.000 |        |
| 36: | 4 1 3    | 0  | - | 4 0 4       | 0   | 15971.9   | 0.5   | -0.183 |        |
| 37: | 1 1 1    | 1  | - | 1 0 1       | 0   | 16734.113 | 0.004 | -0.001 |        |
| 38: | 4 1 3    | 1  | - | 4 1 4       | 0   | 16786.8   | 0.5   | 0.254  |        |
| 39: | 5 2 4    | 0  | - | 5 1 4       | 1   | 16897.58  | 0.10  | 0.226  |        |
| 40: | 1 0 1    | 1  | - | 0 0 0       | 0   | 17153.563 | 0.004 | -0.004 |        |
| 41: | 1 1 1    | 1  | - | 0 0 0       | 1   | 19977.471 | 0.004 | -0.003 |        |
| 42: | 1 1 1    | 0  | - | 0 0 0       | 0   | 19982.327 | 0.004 | -0.001 |        |
| 43: | 3 0 3    | 0  | - | 2 0 2       | 1   | 23392.95  | 0.10  | -0.174 |        |

|      |   |   |   |   |   |   |   |   |   |           |       |        |
|------|---|---|---|---|---|---|---|---|---|-----------|-------|--------|
| 44:  | 3 | 1 | 2 | 0 | - | 2 | 1 | 1 | 1 | 25027.582 | 0.008 | 0.005  |
| 45:  | 2 | 1 | 2 | 1 | - | 1 | 1 | 1 | 0 | 26381.68  | 0.10  | 0.070  |
| 46:  | 2 | 0 | 2 | 1 | - | 1 | 0 | 1 | 0 | 27268.60  | 0.10  | -0.029 |
| 47:  | 3 | 2 | 1 | 1 | - | 3 | 1 | 2 | 1 | 28259.32  | 0.10  | 0.056  |
| 48:  | 3 | 2 | 1 | 0 | - | 3 | 1 | 2 | 0 | 28291.90  | 0.10  | -0.062 |
| 49:  | 2 | 1 | 1 | 1 | - | 1 | 1 | 0 | 0 | 28331.44  | 0.10  | 0.046  |
| 50:  | 2 | 1 | 2 | 1 | - | 1 | 0 | 1 | 1 | 29210.41  | 0.10  | 0.039  |
| 51:  | 2 | 1 | 2 | 0 | - | 1 | 0 | 1 | 0 | 29226.86  | 0.10  | 0.075  |
| 52:  | 2 | 2 | 0 | 1 | - | 2 | 1 | 1 | 1 | 29400.30  | 0.10  | 0.070  |
| 53:  | 2 | 2 | 0 | 0 | - | 2 | 1 | 1 | 0 | 29401.91  | 0.10  | 0.040  |
| 54:  | 4 | 0 | 4 | 0 | - | 3 | 0 | 3 | 1 | 33272.94  | 0.10  | 0.027  |
| 55:  | 3 | 2 | 2 | 0 | - | 3 | 1 | 3 | 0 | 33656.41  | 0.10  | -0.076 |
| 56:  | 4 | 2 | 3 | 0 | - | 3 | 2 | 2 | 1 | 33806.29  | 0.10  | 0.096  |
| 57:  | 4 | 3 | 2 | 0 | - | 3 | 3 | 1 | 1 | 33976.78  | 0.10  | 0.064  |
| 58:  | 4 | 3 | 1 | 0 | - | 3 | 3 | 0 | 1 | 33994.55  | 0.10  | -0.060 |
| 59:  | 4 | 1 | 3 | 0 | - | 3 | 1 | 2 | 1 | 35673.42  | 0.10  | -0.120 |
| 60:  | 4 | 2 | 3 | 0 | - | 4 | 1 | 4 | 0 | 35915.05  | 0.10  | -0.039 |
| 61:  | 3 | 1 | 3 | 1 | - | 2 | 1 | 2 | 0 | 36061.52  | 0.10  | 0.049  |
| 62:  | 3 | 0 | 3 | 1 | - | 2 | 0 | 2 | 0 | 37187.66  | 0.10  | -0.101 |
| 63:  | 3 | 2 | 2 | 1 | - | 2 | 2 | 1 | 0 | 37557.22  | 0.10  | -0.166 |
| 64:  | 3 | 1 | 3 | 1 | - | 2 | 0 | 2 | 1 | 38019.71  | 0.10  | 0.083  |
| 65:  | 3 | 1 | 3 | 0 | - | 2 | 0 | 2 | 0 | 38070.20  | 0.10  | 0.042  |
| 66:  | 5 | 2 | 4 | 1 | - | 5 | 1 | 5 | 1 | 38351.84  | 0.10  | 0.076  |
| 67:  | 3 | 1 | 2 | 1 | - | 2 | 1 | 1 | 0 | 38973.40  | 0.10  | -0.012 |
| 68:  | 5 | 0 | 5 | 0 | - | 4 | 0 | 4 | 1 | 42629.07  | 0.10  | 0.202  |
| 69:  | 5 | 2 | 4 | 0 | - | 4 | 2 | 3 | 1 | 43919.68  | 0.10  | 0.112  |
| 70:  | 5 | 4 | 2 | 0 | - | 4 | 4 | 1 | 1 | 44199.66  | 0.10  | 0.024  |
| 71:  | 5 | 4 | 1 | 0 | - | 4 | 4 | 0 | 1 | 44200.57  | 0.10  | 0.068  |
| 72:  | 5 | 3 | 3 | 0 | - | 4 | 3 | 2 | 1 | 44263.94  | 0.10  | 0.105  |
| 73:  | 5 | 3 | 2 | 0 | - | 4 | 3 | 1 | 1 | 44325.98  | 0.10  | 0.100  |
| 74:  | 8 | 3 | 5 | 1 | - | 8 | 2 | 6 | 1 | 44542.38  | 0.10  | -0.046 |
| 75:  | 7 | 2 | 6 | 0 | - | 7 | 1 | 7 | 0 | 45107.79  | 0.10  | 0.132  |
| 76:  | 5 | 2 | 3 | 0 | - | 4 | 2 | 2 | 1 | 45179.72  | 0.10  | -0.053 |
| 77:  | 4 | 1 | 4 | 1 | - | 3 | 1 | 3 | 0 | 45547.64  | 0.10  | -0.052 |
| 78:  | 5 | 1 | 4 | 0 | - | 4 | 1 | 3 | 1 | 46166.54  | 0.10  | 0.013  |
| 79:  | 7 | 3 | 4 | 1 | - | 7 | 2 | 5 | 1 | 46599.95  | 0.10  | -0.008 |
| 80:  | 4 | 0 | 4 | 1 | - | 3 | 0 | 3 | 0 | 47217.41  | 0.10  | -0.045 |
| 81:  | 4 | 2 | 3 | 1 | - | 3 | 2 | 2 | 0 | 47696.40  | 0.10  | 0.019  |
| 82:  | 4 | 3 | 2 | 1 | - | 3 | 3 | 1 | 0 | 47888.67  | 0.10  | -0.058 |
| 83:  | 4 | 3 | 1 | 1 | - | 3 | 3 | 0 | 0 | 47906.87  | 0.10  | -0.058 |
| 84:  | 6 | 3 | 3 | 1 | - | 6 | 2 | 4 | 1 | 48364.80  | 0.10  | 0.188  |
| 85:  | 4 | 2 | 2 | 1 | - | 3 | 2 | 1 | 0 | 48366.82  | 0.10  | 0.101  |
| 86:  | 8 | 2 | 7 | 1 | - | 8 | 1 | 8 | 1 | 49044.84  | 0.10  | 0.048  |
| 87:  | 4 | 1 | 3 | 0 | - | 3 | 0 | 3 | 1 | 49245.24  | 0.10  | 0.245  |
| 88:  | 4 | 1 | 3 | 1 | - | 3 | 1 | 2 | 0 | 49581.05  | 0.10  | 0.005  |
| 89:  | 5 | 3 | 2 | 1 | - | 5 | 2 | 3 | 1 | 49690.64  | 0.10  | -0.007 |
| 90:  | 2 | 2 | 1 | 1 | - | 1 | 1 | 0 | 1 | 50703.73  | 0.10  | 0.035  |
| 91:  | 2 | 2 | 1 | 0 | - | 1 | 1 | 0 | 0 | 50704.97  | 0.10  | -0.010 |
| 92:  | 3 | 1 | 2 | 1 | - | 2 | 0 | 2 | 0 | 50759.34  | 0.10  | 0.124  |
| 93:  | 6 | 1 | 6 | 0 | - | 5 | 1 | 5 | 1 | 50836.33  | 0.10  | 0.228  |
| 94:  | 2 | 2 | 0 | 0 | - | 1 | 1 | 1 | 0 | 51739.68  | 0.10  | 0.129  |
| 95:  | 6 | 0 | 6 | 0 | - | 5 | 0 | 5 | 1 | 52075.84  | 0.10  | 0.224  |
| 96:  | 6 | 3 | 4 | 0 | - | 6 | 2 | 5 | 0 | 52486.36  | 0.10  | -0.132 |
| 97:  | 6 | 2 | 5 | 0 | - | 5 | 2 | 4 | 1 | 53975.87  | 0.10  | 0.192  |
| 98:  | 6 | 4 | 3 | 0 | - | 5 | 4 | 2 | 1 | 54490.76  | 0.10  | 0.148  |
| 99:  | 6 | 4 | 2 | 0 | - | 5 | 4 | 1 | 1 | 54494.70  | 0.10  | 0.214  |
| 100: | 8 | 3 | 6 | 0 | - | 8 | 2 | 7 | 0 | 54715.37  | 0.10  | -0.038 |
| 101: | 6 | 3 | 3 | 0 | - | 5 | 3 | 2 | 1 | 54731.08  | 0.10  | 0.088  |
| 102: | 6 | 2 | 4 | 0 | - | 5 | 2 | 3 | 1 | 56017.36  | 0.10  | 0.010  |
| 103: | 6 | 1 | 5 | 0 | - | 5 | 1 | 4 | 1 | 56551.93  | 0.10  | 0.049  |
| 104: | 5 | 2 | 4 | 1 | - | 4 | 2 | 3 | 0 | 57789.24  | 0.10  | -0.083 |

|      |    |   |    |   |   |    |   |    |   |           |       |        |        |
|------|----|---|----|---|---|----|---|----|---|-----------|-------|--------|--------|
| 105: | 5  | 3 | 2  | 1 | - | 4  | 3 | 1  | 0 | 58219.40  | 0.10  | -0.044 |        |
| 106: | 5  | 2 | 3  | 1 | - | 4  | 2 | 2  | 0 | 59076.26  | 0.10  | -0.053 |        |
| 107: | 6  | 2 | 5  | 0 | - | 5  | 1 | 4  | 0 | 84726.85  | 0.10  | -0.167 |        |
| 108: | 6  | 0 | 6  | 0 | - | 5  | 1 | 5  | 0 | 54334.230 | 0.020 | -0.011 |        |
| 109: | 6  | 0 | 6  | 1 | - | 5  | 1 | 5  | 1 | 54339.468 | 0.010 | 0.003  |        |
| 110: | 6  | 5 | 2  | 0 | - | 5  | 5 | 1  | 1 | 54417.853 | 0.010 | 0.003  | 0.5625 |
| 111: | 6  | 5 | 1  | 0 | - | 5  | 5 | 0  | 1 | 54417.853 | 0.010 | 0.003  | 0.4375 |
| 112: | 17 | 3 | 14 | 0 | - | 17 | 2 | 15 | 0 | 55085.168 | 0.010 | -0.002 |        |
| 113: | 5  | 1 | 5  | 1 | - | 4  | 1 | 4  | 0 | 55352.657 | 0.010 | 0.009  |        |
| 114: | 10 | 1 | 9  | 1 | - | 10 | 1 | 10 | 0 | 55675.355 | 0.020 | -0.007 |        |
| 115: | 17 | 3 | 14 | 1 | - | 17 | 2 | 15 | 1 | 55698.681 | 0.010 | 0.001  |        |
| 116: | 15 | 2 | 13 | 0 | - | 15 | 2 | 14 | 1 | 56099.268 | 0.030 | -0.014 |        |
| 117: | 20 | 4 | 16 | 0 | - | 20 | 3 | 17 | 0 | 56239.618 | 0.030 | 0.006  |        |
| 118: | 20 | 4 | 16 | 1 | - | 20 | 3 | 17 | 1 | 56377.608 | 0.020 | 0.011  |        |
| 119: | 9  | 3 | 7  | 0 | - | 9  | 2 | 8  | 0 | 56451.411 | 0.010 | 0.001  |        |
| 120: | 9  | 3 | 7  | 1 | - | 9  | 2 | 8  | 1 | 56609.357 | 0.010 | 0.000  |        |
| 121: | 5  | 0 | 5  | 1 | - | 4  | 0 | 4  | 0 | 56729.587 | 0.010 | 0.009  |        |
| 122: | 11 | 2 | 10 | 0 | - | 11 | 0 | 11 | 1 | 58173.055 | 0.020 | -0.012 |        |
| 123: | 10 | 3 | 8  | 0 | - | 10 | 2 | 9  | 0 | 58617.159 | 0.020 | -0.007 |        |
| 124: | 23 | 4 | 19 | 0 | - | 23 | 4 | 20 | 1 | 58790.919 | 0.010 | 0.003  |        |
| 125: | 19 | 3 | 16 | 0 | - | 19 | 3 | 17 | 1 | 59008.729 | 0.020 | -0.015 |        |
| 126: | 7  | 1 | 7  | 0 | - | 6  | 1 | 6  | 1 | 60297.213 | 0.010 | -0.005 |        |
| 127: | 21 | 4 | 17 | 0 | - | 21 | 3 | 18 | 0 | 60767.957 | 0.010 | 0.002  |        |
| 128: | 11 | 3 | 9  | 0 | - | 11 | 2 | 10 | 0 | 60986.099 | 0.010 | -0.009 |        |
| 129: | 21 | 4 | 17 | 1 | - | 21 | 3 | 18 | 1 | 61023.214 | 0.020 | 0.011  |        |
| 130: | 11 | 3 | 9  | 1 | - | 11 | 2 | 10 | 1 | 61199.893 | 0.020 | -0.013 |        |
| 131: | 18 | 3 | 15 | 0 | - | 18 | 2 | 16 | 0 | 62079.323 | 0.030 | 0.015  |        |
| 132: | 12 | 4 | 8  | 0 | - | 12 | 3 | 9  | 0 | 62825.275 | 0.010 | 0.004  |        |
| 133: | 12 | 4 | 8  | 1 | - | 12 | 3 | 9  | 1 | 62936.263 | 0.020 | 0.005  |        |
| 134: | 11 | 1 | 10 | 1 | - | 11 | 1 | 11 | 0 | 63014.069 | 0.010 | -0.013 |        |
| 135: | 12 | 3 | 10 | 0 | - | 12 | 1 | 11 | 1 | 63020.310 | 0.010 | -0.005 |        |
| 136: | 23 | 5 | 18 | 1 | - | 23 | 4 | 19 | 1 | 63470.405 | 0.010 | 0.010  |        |
| 137: | 23 | 5 | 18 | 0 | - | 23 | 4 | 19 | 0 | 63525.345 | 0.010 | -0.007 |        |
| 138: | 18 | 3 | 15 | 1 | - | 18 | 3 | 16 | 0 | 63612.008 | 0.010 | -0.001 |        |
| 139: | 22 | 5 | 17 | 1 | - | 22 | 4 | 18 | 1 | 63784.297 | 0.010 | 0.006  |        |
| 140: | 22 | 5 | 17 | 0 | - | 22 | 4 | 18 | 0 | 63927.609 | 0.010 | -0.010 |        |
| 141: | 11 | 2 | 10 | 1 | - | 11 | 1 | 11 | 1 | 63937.987 | 0.020 | -0.012 |        |
| 142: | 15 | 2 | 13 | 1 | - | 15 | 1 | 14 | 1 | 64313.761 | 0.020 | -0.014 |        |
| 143: | 7  | 6 | 2  | 0 | - | 6  | 6 | 1  | 1 | 64636.833 | 0.010 | -0.000 | 0.5625 |
| 144: | 7  | 6 | 1  | 0 | - | 6  | 6 | 0  | 1 | 64636.833 | 0.010 | -0.000 | 0.4375 |
| 145: | 24 | 5 | 19 | 0 | - | 24 | 4 | 20 | 0 | 64639.489 | 0.010 | -0.001 |        |
| 146: | 15 | 2 | 13 | 0 | - | 15 | 1 | 14 | 0 | 64648.524 | 0.010 | -0.006 |        |
| 147: | 24 | 5 | 19 | 1 | - | 24 | 4 | 20 | 1 | 64678.423 | 0.010 | 0.014  |        |
| 148: | 12 | 1 | 11 | 0 | - | 12 | 0 | 12 | 0 | 64690.943 | 0.010 | -0.026 |        |
| 149: | 12 | 3 | 10 | 1 | - | 12 | 2 | 11 | 1 | 64758.470 | 0.010 | -0.015 |        |
| 150: | 16 | 2 | 14 | 0 | - | 16 | 2 | 15 | 1 | 64773.996 | 0.020 | -0.014 |        |
| 151: | 6  | 1 | 6  | 1 | - | 5  | 1 | 5  | 0 | 64796.480 | 0.010 | -0.004 |        |
| 152: | 7  | 4 | 4  | 0 | - | 6  | 4 | 3  | 1 | 64807.431 | 0.010 | -0.006 |        |
| 153: | 7  | 4 | 3  | 0 | - | 6  | 4 | 2  | 1 | 64820.230 | 0.010 | -0.005 |        |
| 154: | 7  | 0 | 7  | 0 | - | 6  | 1 | 6  | 0 | 64826.258 | 0.010 | -0.001 |        |
| 155: | 7  | 0 | 7  | 1 | - | 6  | 1 | 6  | 1 | 64837.637 | 0.020 | 0.004  |        |
| 156: | 7  | 3 | 5  | 0 | - | 6  | 3 | 4  | 1 | 64880.061 | 0.010 | -0.005 |        |
| 157: | 12 | 1 | 11 | 1 | - | 12 | 0 | 12 | 1 | 64948.739 | 0.010 | -0.015 |        |
| 158: | 7  | 3 | 4  | 0 | - | 6  | 3 | 3  | 1 | 65237.861 | 0.010 | -0.010 |        |
| 159: | 19 | 6 | 14 | 1 | - | 18 | 7 | 11 | 1 | 65262.004 | 0.040 | 0.006  |        |
| 160: | 12 | 3 | 10 | 0 | - | 12 | 2 | 11 | 0 | 65309.779 | 0.020 | 0.005  |        |
| 161: | 21 | 5 | 16 | 1 | - | 21 | 4 | 17 | 1 | 65418.731 | 0.010 | 0.002  |        |
| 162: | 11 | 4 | 7  | 1 | - | 11 | 3 | 8  | 1 | 65511.550 | 0.010 | 0.009  |        |
| 163: | 21 | 5 | 16 | 0 | - | 21 | 4 | 17 | 0 | 65664.903 | 0.020 | -0.001 |        |

|      |    |   |    |   |   |    |   |    |   |           |       |        |        |
|------|----|---|----|---|---|----|---|----|---|-----------|-------|--------|--------|
| 164: | 6  | 0 | 6  | 1 | - | 5  | 0 | 5  | 0 | 66085.041 | 0.010 | 0.000  |        |
| 165: | 7  | 2 | 6  | 1 | - | 6  | 2 | 4  | 1 | 66222.201 | 0.010 | -0.001 |        |
| 166: | 10 | 2 | 8  | 1 | - | 9  | 3 | 7  | 1 | 66476.176 | 0.010 | -0.001 |        |
| 167: | 22 | 4 | 18 | 0 | - | 22 | 3 | 19 | 0 | 66740.548 | 0.030 | 0.010  |        |
| 168: | 22 | 4 | 18 | 1 | - | 22 | 3 | 19 | 1 | 67177.940 | 0.020 | 0.011  |        |
| 169: | 7  | 2 | 5  | 0 | - | 6  | 2 | 4  | 1 | 67228.525 | 0.010 | -0.002 |        |
| 170: | 25 | 5 | 20 | 0 | - | 25 | 4 | 21 | 0 | 67382.269 | 0.010 | -0.000 |        |
| 171: | 25 | 5 | 20 | 1 | - | 25 | 4 | 21 | 1 | 67526.252 | 0.040 | 0.013  |        |
| 172: | 10 | 4 | 6  | 1 | - | 10 | 3 | 7  | 1 | 67607.705 | 0.010 | 0.010  |        |
| 173: | 10 | 4 | 6  | 0 | - | 10 | 3 | 7  | 0 | 67703.241 | 0.010 | 0.007  |        |
| 174: | 6  | 2 | 5  | 1 | - | 5  | 2 | 4  | 0 | 67841.412 | 0.010 | -0.004 |        |
| 175: | 20 | 5 | 15 | 1 | - | 20 | 4 | 16 | 1 | 68091.665 | 0.040 | 0.004  |        |
| 176: | 6  | 5 | 2  | 1 | - | 5  | 5 | 1  | 0 | 68342.639 | 0.010 | -0.003 | 0.4375 |
| 177: | 6  | 5 | 1  | 1 | - | 5  | 5 | 0  | 0 | 68342.639 | 0.010 | -0.003 | 0.5625 |
| 178: | 6  | 4 | 2  | 1 | - | 5  | 4 | 1  | 0 | 68388.028 | 0.010 | -0.000 |        |
| 179: | 20 | 5 | 15 | 0 | - | 20 | 4 | 16 | 0 | 68575.442 | 0.020 | 0.006  |        |
| 180: | 13 | 3 | 11 | 1 | - | 13 | 2 | 12 | 1 | 68601.918 | 0.010 | -0.015 |        |
| 181: | 14 | 3 | 12 | 0 | - | 14 | 1 | 13 | 1 | 68705.596 | 0.040 | -0.010 |        |
| 182: | 20 | 3 | 17 | 0 | - | 20 | 3 | 18 | 1 | 68747.382 | 0.030 | -0.012 |        |
| 183: | 12 | 2 | 11 | 0 | - | 12 | 1 | 12 | 0 | 69374.280 | 0.020 | -0.010 |        |
| 184: | 19 | 5 | 14 | 0 | - | 19 | 4 | 15 | 0 | 71030.467 | 0.030 | -0.008 |        |
| 185: | 10 | 4 | 7  | 1 | - | 10 | 3 | 8  | 1 | 71740.609 | 0.020 | -0.008 |        |
| 186: | 19 | 3 | 16 | 1 | - | 19 | 3 | 17 | 0 | 72774.840 | 0.030 | 0.009  |        |
| 187: | 8  | 2 | 7  | 0 | - | 7  | 2 | 5  | 0 | 73149.018 | 0.010 | 0.014  |        |
| 188: | 23 | 4 | 19 | 1 | - | 23 | 3 | 20 | 1 | 74787.756 | 0.030 | 0.002  |        |
| 189: | 8  | 7 | 1  | 0 | - | 7  | 7 | 0  | 1 | 74856.414 | 0.010 | -0.007 | 0.5625 |
| 190: | 8  | 7 | 2  | 0 | - | 7  | 7 | 1  | 1 | 74856.414 | 0.010 | -0.007 | 0.4375 |
| 191: | 8  | 6 | 3  | 0 | - | 7  | 6 | 2  | 1 | 74918.163 | 0.010 | -0.008 | 0.5625 |
| 192: | 8  | 6 | 2  | 0 | - | 7  | 6 | 1  | 1 | 74918.163 | 0.010 | -0.008 | 0.4375 |
| 193: | 18 | 5 | 13 | 0 | - | 18 | 4 | 14 | 0 | 74975.382 | 0.020 | -0.006 |        |
| 194: | 28 | 6 | 22 | 1 | - | 28 | 5 | 23 | 1 | 75101.203 | 0.010 | 0.013  |        |
| 195: | 18 | 5 | 13 | 1 | - | 18 | 4 | 14 | 1 | 75130.282 | 0.010 | -0.002 |        |
| 196: | 28 | 6 | 22 | 0 | - | 28 | 5 | 23 | 0 | 75192.534 | 0.010 | -0.013 |        |
| 197: | 13 | 2 | 12 | 0 | - | 13 | 1 | 13 | 0 | 75419.872 | 0.030 | -0.007 |        |
| 198: | 13 | 2 | 12 | 1 | - | 13 | 1 | 13 | 1 | 75467.501 | 0.030 | -0.013 |        |
| 199: | 14 | 4 | 11 | 0 | - | 14 | 3 | 12 | 0 | 75586.832 | 0.010 | -0.005 |        |
| 200: | 29 | 6 | 23 | 0 | - | 29 | 5 | 24 | 0 | 75826.205 | 0.010 | -0.010 |        |
| 201: | 29 | 6 | 23 | 1 | - | 29 | 5 | 24 | 1 | 75846.870 | 0.020 | 0.018  |        |
| 202: | 14 | 4 | 11 | 1 | - | 14 | 3 | 12 | 1 | 75872.185 | 0.010 | 0.005  |        |
| 203: | 18 | 5 | 14 | 1 | - | 17 | 6 | 11 | 1 | 75955.134 | 0.020 | 0.011  |        |
| 204: | 27 | 6 | 21 | 1 | - | 27 | 5 | 22 | 1 | 75974.907 | 0.010 | 0.011  |        |
| 205: | 27 | 6 | 21 | 0 | - | 27 | 5 | 22 | 0 | 76169.247 | 0.010 | -0.008 |        |
| 206: | 13 | 3 | 10 | 1 | - | 12 | 4 | 9  | 1 | 76240.156 | 0.030 | -0.004 |        |
| 207: | 16 | 3 | 14 | 0 | - | 16 | 1 | 15 | 1 | 77478.179 | 0.010 | -0.010 |        |
| 208: | 7  | 2 | 6  | 1 | - | 6  | 2 | 5  | 0 | 77521.974 | 0.005 | -0.005 |        |
| 209: | 15 | 4 | 12 | 0 | - | 15 | 3 | 13 | 0 | 77571.698 | 0.010 | -0.003 |        |
| 210: | 15 | 3 | 13 | 1 | - | 15 | 2 | 14 | 1 | 77664.947 | 0.020 | -0.000 |        |
| 211: | 27 | 5 | 22 | 0 | - | 27 | 4 | 23 | 0 | 77761.183 | 0.010 | 0.008  |        |
| 212: | 20 | 3 | 17 | 1 | - | 20 | 2 | 18 | 1 | 77865.109 | 0.040 | 0.002  |        |
| 213: | 15 | 3 | 13 | 0 | - | 15 | 2 | 14 | 0 | 78119.197 | 0.010 | -0.004 |        |
| 214: | 27 | 5 | 22 | 1 | - | 27 | 4 | 23 | 1 | 78177.943 | 0.020 | 0.012  |        |
| 215: | 30 | 6 | 24 | 0 | - | 30 | 5 | 25 | 0 | 78201.981 | 0.010 | -0.002 |        |
| 216: | 16 | 2 | 14 | 1 | - | 16 | 2 | 15 | 0 | 78208.305 | 0.010 | -0.006 |        |
| 217: | 26 | 6 | 20 | 1 | - | 26 | 5 | 21 | 1 | 78242.488 | 0.010 | 0.010  |        |
| 218: | 21 | 3 | 18 | 0 | - | 21 | 3 | 19 | 1 | 78345.271 | 0.050 | -0.031 |        |
| 219: | 30 | 6 | 24 | 1 | - | 30 | 5 | 25 | 1 | 78345.504 | 0.030 | 0.023  |        |
| 220: | 20 | 3 | 17 | 0 | - | 20 | 2 | 18 | 0 | 78380.608 | 0.010 | 0.011  |        |
| 221: | 15 | 4 | 12 | 1 | - | 15 | 3 | 13 | 1 | 78434.093 | 0.020 | 0.000  |        |
| 222: | 7  | 2 | 5  | 0 | - | 6  | 2 | 5  | 0 | 78528.296 | 0.005 | -0.005 |        |
| 223: | 26 | 6 | 20 | 0 | - | 26 | 5 | 21 | 0 | 78542.108 | 0.040 | -0.005 |        |
| 224: | 7  | 6 | 2  | 1 | - | 6  | 6 | 1  | 0 | 78571.895 | 0.005 | -0.007 | 0.5625 |

|      |    |    |    |   |   |    |    |    |   |           |       |        |        |
|------|----|----|----|---|---|----|----|----|---|-----------|-------|--------|--------|
| 225: | 7  | 6  | 1  | 1 | - | 6  | 6  | 0  | 0 | 78571.895 | 0.005 | -0.007 | 0.4375 |
| 226: | 17 | 5  | 12 | 0 | - | 17 | 4  | 13 | 0 | 78620.827 | 0.010 | -0.009 |        |
| 227: | 7  | 4  | 4  | 1 | - | 6  | 4  | 3  | 0 | 78673.380 | 0.005 | -0.005 |        |
| 228: | 7  | 4  | 3  | 1 | - | 6  | 4  | 2  | 0 | 78686.572 | 0.005 | -0.002 |        |
| 229: | 17 | 5  | 12 | 1 | - | 17 | 4  | 13 | 1 | 78757.302 | 0.020 | 0.008  |        |
| 230: | 25 | 6  | 19 | 0 | - | 25 | 5  | 20 | 0 | 82055.795 | 0.020 | -0.011 |        |
| 231: | 17 | 4  | 14 | 0 | - | 17 | 3  | 15 | 0 | 82783.446 | 0.020 | 0.005  |        |
| 232: | 17 | 3  | 15 | 0 | - | 17 | 1  | 16 | 1 | 82955.677 | 0.020 | -0.015 |        |
| 233: | 24 | 4  | 20 | 1 | - | 24 | 4  | 21 | 0 | 83832.618 | 0.020 | 0.021  |        |
| 234: | 24 | 6  | 18 | 0 | - | 24 | 5  | 19 | 0 | 84527.020 | 0.030 | -0.029 |        |
| 235: | 18 | 4  | 15 | 0 | - | 18 | 2  | 16 | 1 | 85493.756 | 0.020 | 0.008  |        |
| 236: | 35 | 13 | 23 | 1 | - | 34 | 14 | 20 | 1 | 85540.510 | 0.030 | -0.013 | 0.5625 |
| 237: | 35 | 13 | 22 | 1 | - | 34 | 14 | 21 | 1 | 85540.510 | 0.030 | -0.013 | 0.4375 |
| 238: | 35 | 13 | 23 | 0 | - | 34 | 14 | 20 | 0 | 85621.307 | 0.030 | 0.003  | 0.4375 |
| 239: | 35 | 13 | 22 | 0 | - | 34 | 14 | 21 | 0 | 85621.307 | 0.030 | 0.003  | 0.5625 |
| 240: | 28 | 5  | 23 | 1 | - | 28 | 4  | 24 | 1 | 85785.195 | 0.010 | 0.014  |        |
| 241: | 17 | 2  | 15 | 1 | - | 17 | 2  | 16 | 0 | 86294.598 | 0.020 | 0.002  |        |
| 242: | 24 | 6  | 19 | 1 | - | 24 | 5  | 19 | 0 | 86678.234 | 0.020 | 0.003  |        |
| 243: | 19 | 4  | 16 | 0 | - | 19 | 2  | 17 | 1 | 88328.109 | 0.010 | 0.003  |        |
| 244: | 18 | 2  | 16 | 1 | - | 18 | 1  | 17 | 1 | 89443.489 | 0.010 | -0.009 |        |
| 245: | 15 | 5  | 11 | 1 | - | 15 | 4  | 12 | 1 | 90155.589 | 0.010 | 0.008  |        |
| 246: | 18 | 3  | 16 | 0 | - | 18 | 2  | 17 | 0 | 93476.789 | 0.010 | -0.001 |        |
| 247: | 39 | 7  | 32 | 0 | - | 39 | 7  | 33 | 1 | 94050.332 | 0.030 | -0.047 |        |
| 248: | 50 | 20 | 31 | 1 | - | 49 | 21 | 28 | 1 | 94297.196 | 0.020 | -0.016 | 0.4375 |
| 249: | 50 | 20 | 30 | 1 | - | 49 | 21 | 29 | 1 | 94297.196 | 0.020 | -0.016 | 0.5625 |
| 250: | 19 | 5  | 15 | 1 | - | 19 | 4  | 16 | 1 | 94371.044 | 0.010 | 0.014  |        |
| 251: | 50 | 20 | 30 | 0 | - | 49 | 21 | 29 | 0 | 94404.127 | 0.030 | -0.002 | 0.4375 |
| 252: | 50 | 20 | 31 | 0 | - | 49 | 21 | 28 | 0 | 94404.127 | 0.030 | -0.002 | 0.5625 |
| 253: | 48 | 19 | 30 | 1 | - | 47 | 20 | 27 | 1 | 94600.419 | 0.020 | -0.031 | 0.4375 |
| 254: | 48 | 19 | 29 | 1 | - | 47 | 20 | 28 | 1 | 94600.419 | 0.020 | -0.031 | 0.5625 |
| 255: | 48 | 19 | 29 | 0 | - | 47 | 20 | 28 | 0 | 94704.455 | 0.030 | -0.011 | 0.4375 |
| 256: | 48 | 19 | 30 | 0 | - | 47 | 20 | 27 | 0 | 94704.455 | 0.030 | -0.011 | 0.5625 |
| 257: | 46 | 18 | 29 | 1 | - | 45 | 19 | 26 | 1 | 94891.303 | 0.020 | -0.018 | 0.4375 |
| 258: | 46 | 18 | 28 | 1 | - | 45 | 19 | 27 | 1 | 94891.303 | 0.020 | -0.018 | 0.5625 |
| 259: | 22 | 3  | 19 | 1 | - | 22 | 2  | 20 | 1 | 94962.394 | 0.030 | -0.003 |        |
| 260: | 46 | 18 | 28 | 0 | - | 45 | 19 | 27 | 0 | 94991.986 | 0.030 | -0.029 | 0.4375 |
| 261: | 46 | 18 | 29 | 0 | - | 45 | 19 | 26 | 0 | 94991.986 | 0.030 | -0.029 | 0.5625 |
| 262: | 44 | 17 | 28 | 1 | - | 43 | 18 | 25 | 1 | 95171.767 | 0.020 | -0.044 | 0.4375 |
| 263: | 44 | 17 | 27 | 1 | - | 43 | 18 | 26 | 1 | 95171.767 | 0.020 | -0.044 | 0.5625 |
| 264: | 44 | 17 | 28 | 0 | - | 43 | 18 | 25 | 0 | 95268.759 | 0.030 | -0.021 | 0.5625 |
| 265: | 44 | 17 | 27 | 0 | - | 43 | 18 | 26 | 0 | 95268.759 | 0.030 | -0.021 | 0.4375 |
| 266: | 20 | 5  | 16 | 1 | - | 20 | 4  | 17 | 1 | 95276.451 | 0.010 | -0.001 |        |
| 267: | 42 | 16 | 27 | 1 | - | 41 | 17 | 24 | 1 | 95444.350 | 0.020 | -0.019 | 0.4375 |
| 268: | 42 | 16 | 26 | 1 | - | 41 | 17 | 25 | 1 | 95444.350 | 0.020 | -0.019 | 0.5625 |
| 269: | 42 | 16 | 27 | 0 | - | 41 | 17 | 24 | 0 | 95537.200 | 0.020 | -0.020 | 0.5625 |
| 270: | 42 | 16 | 26 | 0 | - | 41 | 17 | 25 | 0 | 95537.200 | 0.020 | -0.020 | 0.4375 |
| 271: | 40 | 15 | 26 | 1 | - | 39 | 16 | 23 | 1 | 95712.060 | 0.020 | -0.017 | 0.4375 |
| 272: | 40 | 15 | 25 | 1 | - | 39 | 16 | 24 | 1 | 95712.060 | 0.020 | -0.017 | 0.5625 |
| 273: | 38 | 14 | 25 | 1 | - | 37 | 15 | 22 | 1 | 95978.913 | 0.020 | -0.009 | 0.4375 |
| 274: | 38 | 14 | 24 | 1 | - | 37 | 15 | 23 | 1 | 95978.913 | 0.020 | -0.009 | 0.5625 |
| 275: | 38 | 14 | 25 | 0 | - | 37 | 15 | 22 | 0 | 96062.350 | 0.040 | -0.031 | 0.5625 |
| 276: | 38 | 14 | 24 | 0 | - | 37 | 15 | 23 | 0 | 96062.350 | 0.040 | -0.031 | 0.4375 |
| 277: | 36 | 13 | 24 | 1 | - | 35 | 14 | 21 | 1 | 96250.216 | 0.020 | 0.000  | 0.4375 |
| 278: | 36 | 13 | 23 | 1 | - | 35 | 14 | 22 | 1 | 96250.216 | 0.020 | 0.000  | 0.5625 |
| 279: | 36 | 13 | 24 | 0 | - | 35 | 14 | 21 | 0 | 96328.385 | 0.020 | -0.003 | 0.5625 |
| 280: | 36 | 13 | 23 | 0 | - | 35 | 14 | 22 | 0 | 96328.385 | 0.020 | -0.003 | 0.4375 |
| 281: | 20 | 5  | 16 | 1 | - | 19 | 6  | 13 | 1 | 96471.160 | 0.030 | -0.009 |        |
| 282: | 30 | 10 | 21 | 1 | - | 29 | 11 | 18 | 1 | 97177.983 | 0.020 | 0.010  |        |
| 283: | 30 | 10 | 20 | 1 | - | 29 | 11 | 19 | 1 | 97185.421 | 0.020 | 0.016  |        |
| 284: | 30 | 10 | 21 | 0 | - | 29 | 11 | 18 | 0 | 97237.814 | 0.020 | 0.016  |        |
| 285: | 30 | 10 | 20 | 0 | - | 29 | 11 | 19 | 0 | 97244.907 | 0.020 | 0.014  |        |

|      |    |    |    |   |   |    |    |    |   |            |       |        |        |
|------|----|----|----|---|---|----|----|----|---|------------|-------|--------|--------|
| 286: | 28 | 9  | 20 | 1 | - | 27 | 10 | 17 | 1 | 97569.613  | 0.020 | 0.015  |        |
| 287: | 28 | 9  | 19 | 1 | - | 27 | 10 | 18 | 1 | 97605.728  | 0.020 | 0.011  |        |
| 288: | 28 | 9  | 20 | 0 | - | 27 | 10 | 17 | 0 | 97622.624  | 0.020 | 0.014  |        |
| 289: | 11 | 1  | 11 | 0 | - | 10 | 1  | 10 | 1 | 97648.681  | 0.005 | -0.002 |        |
| 290: | 28 | 9  | 19 | 0 | - | 27 | 10 | 18 | 0 | 97657.319  | 0.020 | 0.013  |        |
| 291: | 11 | 0  | 11 | 0 | - | 10 | 0  | 10 | 1 | 97896.734  | 0.005 | -0.005 |        |
| 292: | 26 | 8  | 19 | 1 | - | 25 | 9  | 16 | 1 | 98016.690  | 0.020 | 0.009  |        |
| 293: | 26 | 8  | 19 | 0 | - | 25 | 9  | 16 | 0 | 98063.113  | 0.020 | 0.012  |        |
| 294: | 26 | 8  | 18 | 1 | - | 25 | 9  | 17 | 1 | 98181.992  | 0.020 | 0.014  |        |
| 295: | 11 | 5  | 6  | 1 | - | 11 | 4  | 8  | 0 | 98200.339  | 0.020 | 0.006  |        |
| 296: | 26 | 8  | 18 | 0 | - | 25 | 9  | 17 | 0 | 98222.814  | 0.020 | 0.017  |        |
| 297: | 9  | 8  | 1  | 1 | - | 8  | 8  | 0  | 0 | 99040.148  | 0.010 | -0.002 | 0.4375 |
| 298: | 9  | 8  | 2  | 1 | - | 8  | 8  | 1  | 0 | 99040.148  | 0.010 | -0.002 | 0.5625 |
| 299: | 9  | 7  | 3  | 1 | - | 8  | 7  | 2  | 0 | 99046.860  | 0.010 | -0.002 | 0.5625 |
| 300: | 9  | 7  | 2  | 1 | - | 8  | 7  | 1  | 0 | 99046.860  | 0.010 | -0.002 | 0.4375 |
| 301: | 9  | 6  | 4  | 1 | - | 8  | 6  | 3  | 0 | 99082.055  | 0.005 | 0.001  | 0.5625 |
| 302: | 9  | 6  | 3  | 1 | - | 8  | 6  | 2  | 0 | 99082.055  | 0.005 | 0.001  | 0.4375 |
| 303: | 40 | 8  | 32 | 0 | - | 40 | 7  | 33 | 0 | 99238.954  | 0.030 | -0.004 |        |
| 304: | 40 | 8  | 32 | 1 | - | 40 | 7  | 33 | 1 | 99342.999  | 0.010 | -0.004 |        |
| 305: | 26 | 4  | 22 | 1 | - | 26 | 3  | 23 | 1 | 99516.469  | 0.010 | 0.014  |        |
| 306: | 18 | 1  | 17 | 0 | - | 18 | 1  | 18 | 1 | 99529.278  | 0.030 | -0.013 |        |
| 307: | 35 | 6  | 29 | 0 | - | 35 | 6  | 30 | 1 | 99675.075  | 0.020 | -0.006 |        |
| 308: | 44 | 8  | 36 | 0 | - | 44 | 8  | 37 | 1 | 99701.815  | 0.020 | -0.009 |        |
| 309: | 17 | 1  | 16 | 1 | - | 17 | 0  | 17 | 1 | 99835.136  | 0.010 | 0.003  |        |
| 310: | 17 | 1  | 16 | 0 | - | 17 | 0  | 17 | 0 | 99878.290  | 0.010 | -0.008 |        |
| 311: | 22 | 3  | 19 | 1 | - | 22 | 3  | 20 | 0 | 100743.709 | 0.010 | 0.010  |        |
| 312: | 22 | 4  | 19 | 0 | - | 22 | 2  | 20 | 1 | 101105.155 | 0.010 | 0.006  |        |
| 313: | 20 | 6  | 14 | 0 | - | 20 | 5  | 15 | 0 | 101132.226 | 0.020 | -0.005 |        |
| 314: | 22 | 6  | 16 | 1 | - | 21 | 7  | 15 | 1 | 101202.588 | 0.020 | 0.027  |        |
| 315: | 18 | 3  | 16 | 1 | - | 18 | 1  | 17 | 0 | 101469.348 | 0.010 | 0.015  |        |
| 316: | 11 | 1  | 10 | 1 | - | 10 | 2  | 9  | 1 | 102064.077 | 0.005 | -0.005 |        |
| 317: | 23 | 5  | 19 | 0 | - | 23 | 4  | 20 | 0 | 103649.672 | 0.010 | 0.016  |        |
| 318: | 11 | 2  | 10 | 0 | - | 10 | 2  | 9  | 1 | 103771.319 | 0.020 | -0.000 |        |
| 319: | 11 | 0  | 11 | 0 | - | 10 | 1  | 10 | 0 | 104187.364 | 0.020 | 0.002  |        |
| 320: | 11 | 0  | 11 | 1 | - | 10 | 1  | 10 | 1 | 104196.935 | 0.020 | -0.000 |        |
| 321: | 28 | 7  | 21 | 0 | - | 28 | 6  | 22 | 0 | 104277.341 | 0.010 | -0.001 |        |
| 322: | 51 | 20 | 31 | 1 | - | 50 | 21 | 30 | 1 | 104689.479 | 0.030 | 0.004  | 0.4375 |
| 323: | 51 | 20 | 32 | 1 | - | 50 | 21 | 29 | 1 | 104689.479 | 0.030 | 0.004  | 0.5625 |
| 324: | 51 | 20 | 32 | 0 | - | 50 | 21 | 29 | 0 | 104793.063 | 0.030 | 0.037  | 0.4375 |
| 325: | 51 | 20 | 31 | 0 | - | 50 | 21 | 30 | 0 | 104793.063 | 0.030 | 0.037  | 0.5625 |
| 326: | 49 | 19 | 30 | 1 | - | 48 | 20 | 29 | 1 | 105038.239 | 0.030 | -0.007 | 0.4375 |
| 327: | 49 | 19 | 31 | 1 | - | 48 | 20 | 28 | 1 | 105038.239 | 0.030 | -0.007 | 0.5625 |
| 328: | 49 | 19 | 31 | 0 | - | 48 | 20 | 28 | 0 | 105139.056 | 0.030 | 0.012  | 0.4375 |
| 329: | 49 | 19 | 30 | 0 | - | 48 | 20 | 29 | 0 | 105139.056 | 0.030 | 0.012  | 0.5625 |
| 330: | 11 | 1  | 11 | 1 | - | 10 | 0  | 10 | 1 | 105288.819 | 0.010 | 0.005  |        |
| 331: | 11 | 1  | 11 | 0 | - | 10 | 0  | 10 | 0 | 105293.457 | 0.010 | 0.007  |        |
| 332: | 38 | 7  | 31 | 0 | - | 38 | 6  | 32 | 0 | 105515.128 | 0.020 | -0.027 |        |
| 333: | 11 | 10 | 2  | 0 | - | 10 | 10 | 1  | 1 | 105518.135 | 0.005 | 0.000  | 0.4375 |
| 334: | 11 | 10 | 1  | 0 | - | 10 | 10 | 0  | 1 | 105518.135 | 0.005 | 0.000  | 0.5625 |
| 335: | 20 | 4  | 17 | 1 | - | 19 | 5  | 14 | 1 | 105536.649 | 0.020 | 0.023  |        |
| 336: | 11 | 9  | 3  | 0 | - | 10 | 9  | 2  | 1 | 105574.949 | 0.005 | 0.004  | 0.4375 |
| 337: | 11 | 9  | 2  | 0 | - | 10 | 9  | 1  | 1 | 105574.949 | 0.005 | 0.004  | 0.5625 |
| 338: | 11 | 8  | 4  | 0 | - | 10 | 8  | 3  | 1 | 105644.194 | 0.010 | -0.005 | 0.4375 |
| 339: | 11 | 8  | 3  | 0 | - | 10 | 8  | 2  | 1 | 105644.194 | 0.010 | -0.005 | 0.5625 |
| 340: | 11 | 1  | 10 | 0 | - | 10 | 1  | 9  | 1 | 105701.002 | 0.010 | -0.006 |        |
| 341: | 45 | 17 | 28 | 1 | - | 44 | 18 | 27 | 1 | 105704.033 | 0.030 | -0.026 | 0.4375 |
| 342: | 45 | 17 | 29 | 1 | - | 44 | 18 | 26 | 1 | 105704.033 | 0.030 | -0.026 | 0.5625 |
| 343: | 11 | 7  | 5  | 0 | - | 10 | 7  | 4  | 1 | 105735.352 | 0.005 | -0.002 | 0.5625 |
| 344: | 11 | 7  | 4  | 0 | - | 10 | 7  | 3  | 1 | 105735.352 | 0.005 | -0.002 | 0.4375 |
| 345: | 45 | 17 | 29 | 0 | - | 44 | 18 | 26 | 0 | 105798.007 | 0.020 | -0.020 | 0.4375 |
| 346: | 45 | 17 | 28 | 0 | - | 44 | 18 | 27 | 0 | 105798.007 | 0.020 | -0.020 | 0.5625 |

|      |    |    |    |   |   |    |    |    |   |            |       |        |        |
|------|----|----|----|---|---|----|----|----|---|------------|-------|--------|--------|
| 347: | 11 | 3  | 9  | 0 | - | 10 | 3  | 8  | 1 | 105834.696 | 0.005 | -0.005 |        |
| 348: | 20 | 5  | 15 | 1 | - | 19 | 6  | 14 | 1 | 105880.876 | 0.020 | 0.004  |        |
| 349: | 43 | 16 | 28 | 0 | - | 42 | 17 | 25 | 0 | 106116.468 | 0.030 | -0.021 | 0.4375 |
| 350: | 43 | 16 | 27 | 0 | - | 42 | 17 | 26 | 0 | 106116.468 | 0.030 | -0.021 | 0.5625 |
| 351: | 38 | 7  | 31 | 1 | - | 38 | 6  | 32 | 1 | 106125.125 | 0.010 | -0.008 |        |
| 352: | 41 | 15 | 27 | 1 | - | 40 | 16 | 24 | 1 | 106347.033 | 0.030 | -0.012 | 0.5625 |
| 353: | 41 | 15 | 26 | 1 | - | 40 | 16 | 25 | 1 | 106347.033 | 0.030 | -0.012 | 0.4375 |
| 354: | 41 | 15 | 27 | 0 | - | 40 | 16 | 24 | 0 | 106432.466 | 0.030 | -0.022 | 0.4375 |
| 355: | 41 | 15 | 26 | 0 | - | 40 | 16 | 25 | 0 | 106432.466 | 0.030 | -0.022 | 0.5625 |
| 356: | 39 | 14 | 26 | 0 | - | 38 | 15 | 23 | 0 | 106751.061 | 0.030 | -0.023 | 0.4375 |
| 357: | 39 | 14 | 25 | 0 | - | 38 | 15 | 24 | 0 | 106751.061 | 0.030 | -0.023 | 0.5625 |
| 358: | 23 | 4  | 20 | 0 | - | 23 | 2  | 21 | 1 | 106807.092 | 0.020 | 0.009  |        |
| 359: | 24 | 5  | 20 | 0 | - | 24 | 3  | 21 | 1 | 106811.715 | 0.020 | 0.014  |        |
| 360: | 18 | 2  | 17 | 1 | - | 18 | 1  | 18 | 1 | 106895.162 | 0.020 | -0.002 |        |
| 361: | 18 | 2  | 17 | 0 | - | 18 | 1  | 18 | 0 | 106955.389 | 0.010 | 0.001  |        |
| 362: | 40 | 7  | 33 | 0 | - | 40 | 7  | 34 | 1 | 107574.037 | 0.030 | -0.048 |        |
| 363: | 11 | 3  | 9  | 1 | - | 10 | 3  | 7  | 1 | 107782.721 | 0.005 | -0.003 |        |
| 364: | 27 | 4  | 23 | 1 | - | 27 | 3  | 24 | 1 | 108668.036 | 0.020 | 0.011  |        |
| 365: | 29 | 9  | 21 | 1 | - | 28 | 10 | 18 | 1 | 108676.151 | 0.020 | 0.010  |        |
| 366: | 29 | 9  | 21 | 0 | - | 28 | 10 | 18 | 0 | 108725.580 | 0.030 | 0.010  |        |
| 367: | 29 | 9  | 20 | 1 | - | 28 | 10 | 19 | 1 | 108743.053 | 0.030 | 0.025  |        |
| 368: | 5  | 3  | 2  | 1 | - | 4  | 2  | 2  | 0 | 108766.965 | 0.020 | 0.006  |        |
| 369: | 29 | 9  | 20 | 0 | - | 28 | 10 | 19 | 0 | 108789.866 | 0.020 | 0.011  |        |
| 370: | 35 | 8  | 27 | 1 | - | 35 | 7  | 28 | 1 | 108862.558 | 0.010 | 0.015  |        |
| 371: | 44 | 9  | 35 | 1 | - | 44 | 8  | 36 | 1 | 108981.153 | 0.030 | -0.056 |        |
| 372: | 44 | 9  | 35 | 0 | - | 44 | 8  | 36 | 0 | 109101.100 | 0.020 | 0.014  |        |
| 373: | 23 | 3  | 20 | 1 | - | 23 | 3  | 21 | 0 | 109190.707 | 0.010 | 0.009  |        |
| 374: | 27 | 8  | 20 | 1 | - | 26 | 9  | 17 | 1 | 109236.790 | 0.030 | 0.015  |        |
| 375: | 10 | 8  | 3  | 1 | - | 9  | 8  | 2  | 0 | 109277.101 | 0.005 | -0.000 | 0.4375 |
| 376: | 10 | 8  | 2  | 1 | - | 9  | 8  | 1  | 0 | 109277.101 | 0.005 | -0.000 | 0.5625 |
| 377: | 10 | 9  | 2  | 1 | - | 9  | 9  | 1  | 0 | 109279.060 | 0.030 | 0.009  | 0.4375 |
| 378: | 10 | 9  | 1  | 1 | - | 9  | 9  | 0  | 0 | 109279.060 | 0.030 | 0.009  | 0.5625 |
| 379: | 21 | 4  | 18 | 1 | - | 21 | 2  | 19 | 0 | 109295.659 | 0.010 | 0.014  |        |
| 380: | 10 | 7  | 4  | 1 | - | 9  | 7  | 3  | 0 | 109298.663 | 0.010 | -0.002 | 0.4375 |
| 381: | 10 | 7  | 3  | 1 | - | 9  | 7  | 2  | 0 | 109298.663 | 0.010 | -0.002 | 0.5625 |
| 382: | 16 | 6  | 10 | 1 | - | 16 | 5  | 11 | 1 | 109369.551 | 0.010 | 0.005  |        |
| 383: | 16 | 6  | 10 | 0 | - | 16 | 5  | 11 | 0 | 109383.762 | 0.030 | 0.005  |        |
| 384: | 35 | 8  | 27 | 0 | - | 35 | 7  | 28 | 0 | 109439.085 | 0.010 | 0.004  |        |
| 385: | 27 | 7  | 20 | 0 | - | 27 | 6  | 21 | 0 | 109462.206 | 0.010 | 0.002  |        |
| 386: | 27 | 4  | 23 | 0 | - | 27 | 3  | 24 | 0 | 109536.262 | 0.020 | 0.035  |        |
| 387: | 23 | 6  | 18 | 0 | - | 22 | 7  | 15 | 0 | 109583.660 | 0.020 | 0.020  |        |
| 388: | 45 | 9  | 36 | 0 | - | 45 | 8  | 37 | 0 | 109663.999 | 0.010 | 0.021  |        |
| 389: | 45 | 9  | 36 | 1 | - | 45 | 8  | 37 | 1 | 109721.212 | 0.020 | -0.035 |        |
| 390: | 25 | 7  | 19 | 1 | - | 24 | 8  | 16 | 1 | 109729.495 | 0.010 | 0.012  |        |
| 391: | 27 | 7  | 20 | 1 | - | 27 | 6  | 21 | 1 | 109736.380 | 0.010 | 0.005  |        |
| 392: | 25 | 5  | 21 | 0 | - | 25 | 3  | 22 | 1 | 110142.638 | 0.010 | 0.017  |        |
| 393: | 43 | 9  | 34 | 1 | - | 43 | 8  | 35 | 1 | 110194.324 | 0.020 | -0.051 |        |
| 394: | 24 | 6  | 18 | 0 | - | 24 | 5  | 20 | 1 | 110467.738 | 0.020 | -0.002 |        |
| 395: | 43 | 9  | 34 | 0 | - | 43 | 8  | 35 | 0 | 110474.727 | 0.020 | 0.010  |        |
| 396: | 28 | 4  | 24 | 0 | - | 28 | 4  | 25 | 1 | 110510.632 | 0.030 | 0.018  |        |
| 397: | 25 | 7  | 18 | 0 | - | 24 | 8  | 17 | 0 | 110920.477 | 0.020 | 0.005  |        |
| 398: | 25 | 7  | 18 | 1 | - | 24 | 8  | 17 | 1 | 110927.418 | 0.020 | 0.009  |        |
| 399: | 31 | 5  | 26 | 1 | - | 31 | 4  | 27 | 1 | 111391.129 | 0.020 | 0.002  |        |
| 400: | 36 | 6  | 30 | 0 | - | 36 | 6  | 31 | 1 | 112052.937 | 0.020 | -0.014 |        |
| 401: | 11 | 6  | 5  | 0 | - | 11 | 5  | 6  | 0 | 112107.148 | 0.010 | 0.001  |        |
| 402: | 11 | 6  | 5  | 1 | - | 11 | 5  | 6  | 1 | 112123.189 | 0.010 | 0.004  |        |
| 403: | 11 | 6  | 6  | 0 | - | 11 | 5  | 7  | 0 | 112134.020 | 0.010 | 0.010  |        |
| 404: | 11 | 6  | 6  | 1 | - | 11 | 5  | 7  | 1 | 112150.628 | 0.010 | -0.003 |        |
| 405: | 22 | 3  | 20 | 0 | - | 22 | 1  | 21 | 1 | 112179.806 | 0.020 | 0.004  |        |
| 406: | 46 | 9  | 37 | 0 | - | 46 | 8  | 38 | 0 | 112278.969 | 0.020 | 0.049  |        |
| 407: | 24 | 3  | 21 | 0 | - | 24 | 2  | 22 | 0 | 112332.810 | 0.010 | -0.011 |        |

|      |    |    |    |   |   |    |    |    |   |            |       |        |        |
|------|----|----|----|---|---|----|----|----|---|------------|-------|--------|--------|
| 408: | 46 | 9  | 37 | 1 | - | 46 | 8  | 38 | 1 | 112523.407 | 0.020 | 0.016  |        |
| 409: | 31 | 5  | 26 | 0 | - | 31 | 4  | 27 | 0 | 112614.427 | 0.030 | 0.027  |        |
| 410: | 24 | 6  | 19 | 1 | - | 24 | 5  | 20 | 1 | 112618.935 | 0.030 | 0.013  |        |
| 411: | 25 | 3  | 22 | 0 | - | 25 | 3  | 23 | 1 | 112954.840 | 0.020 | 0.003  |        |
| 412: | 32 | 5  | 27 | 0 | - | 32 | 5  | 28 | 1 | 112989.265 | 0.030 | 0.023  |        |
| 413: | 19 | 1  | 18 | 1 | - | 19 | 0  | 19 | 1 | 113102.948 | 0.040 | 0.021  |        |
| 414: | 42 | 9  | 33 | 1 | - | 42 | 8  | 34 | 1 | 113143.305 | 0.020 | -0.024 |        |
| 415: | 19 | 1  | 18 | 0 | - | 19 | 0  | 19 | 0 | 113160.885 | 0.010 | 0.002  |        |
| 416: | 24 | 3  | 21 | 1 | - | 24 | 2  | 22 | 1 | 113371.787 | 0.010 | 0.009  |        |
| 417: | 42 | 9  | 33 | 0 | - | 42 | 8  | 34 | 0 | 113563.041 | 0.020 | 0.016  |        |
| 418: | 27 | 4  | 23 | 1 | - | 27 | 4  | 24 | 0 | 113888.612 | 0.010 | 0.000  |        |
| 419: | 45 | 8  | 37 | 0 | - | 45 | 8  | 38 | 1 | 114082.505 | 0.020 | 0.020  |        |
| 420: | 39 | 7  | 32 | 0 | - | 39 | 6  | 33 | 0 | 114230.339 | 0.010 | -0.023 |        |
| 421: | 43 | 8  | 35 | 0 | - | 43 | 7  | 36 | 0 | 114804.948 | 0.010 | 0.002  |        |
| 422: | 39 | 7  | 32 | 1 | - | 39 | 6  | 33 | 1 | 115039.495 | 0.020 | -0.002 |        |
| 423: | 12 | 3  | 10 | 0 | - | 11 | 3  | 8  | 0 | 115096.489 | 0.010 | 0.006  |        |
| 424: | 35 | 6  | 29 | 1 | - | 35 | 6  | 30 | 0 | 115196.209 | 0.020 | -0.006 |        |
| 425: | 12 | 1  | 11 | 0 | - | 11 | 1  | 10 | 1 | 115290.744 | 0.010 | 0.006  |        |
| 426: | 31 | 5  | 26 | 1 | - | 31 | 5  | 27 | 0 | 115394.556 | 0.020 | -0.005 |        |
| 427: | 43 | 8  | 35 | 1 | - | 43 | 7  | 36 | 1 | 115424.742 | 0.020 | 0.035  |        |
| 428: | 50 | 19 | 32 | 1 | - | 49 | 20 | 29 | 1 | 115493.255 | 0.020 | 0.012  | 0.4375 |
| 429: | 50 | 19 | 31 | 1 | - | 49 | 20 | 30 | 1 | 115493.255 | 0.020 | 0.012  | 0.5625 |
| 430: | 50 | 19 | 31 | 0 | - | 49 | 20 | 30 | 0 | 115590.596 | 0.020 | 0.041  | 0.4375 |
| 431: | 50 | 19 | 32 | 0 | - | 49 | 20 | 29 | 0 | 115590.596 | 0.020 | 0.041  | 0.5625 |
| 432: | 12 | 11 | 1  | 0 | - | 11 | 11 | 0  | 1 | 115739.964 | 0.020 | 0.001  | 0.4375 |
| 433: | 12 | 11 | 2  | 0 | - | 11 | 11 | 1  | 1 | 115739.964 | 0.020 | 0.001  | 0.5625 |
| 434: | 12 | 10 | 2  | 0 | - | 11 | 10 | 1  | 1 | 115796.040 | 0.010 | -0.003 | 0.4375 |
| 435: | 12 | 10 | 3  | 0 | - | 11 | 10 | 2  | 1 | 115796.040 | 0.010 | -0.003 | 0.5625 |
| 436: | 12 | 9  | 3  | 0 | - | 11 | 9  | 2  | 1 | 115862.261 | 0.010 | 0.002  | 0.4375 |
| 437: | 12 | 9  | 4  | 0 | - | 11 | 9  | 3  | 1 | 115862.261 | 0.010 | 0.002  | 0.5625 |
| 438: | 48 | 18 | 31 | 1 | - | 47 | 19 | 28 | 1 | 115880.463 | 0.010 | 0.014  | 0.4375 |
| 439: | 48 | 18 | 30 | 1 | - | 47 | 19 | 29 | 1 | 115880.463 | 0.010 | 0.014  | 0.5625 |
| 440: | 48 | 18 | 30 | 0 | - | 47 | 19 | 29 | 0 | 115974.686 | 0.020 | 0.012  | 0.4375 |
| 441: | 48 | 18 | 31 | 0 | - | 47 | 19 | 28 | 0 | 115974.686 | 0.020 | 0.012  | 0.5625 |
| 442: | 23 | 4  | 20 | 0 | - | 22 | 5  | 17 | 0 | 116021.184 | 0.030 | 0.006  |        |
| 443: | 13 | 1  | 13 | 0 | - | 12 | 1  | 12 | 1 | 116149.656 | 0.010 | -0.013 |        |
| 444: | 22 | 5  | 18 | 1 | - | 21 | 6  | 15 | 1 | 116319.529 | 0.020 | 0.004  |        |
| 445: | 24 | 4  | 21 | 0 | - | 24 | 3  | 22 | 0 | 116739.156 | 0.020 | 0.011  |        |
| 446: | 22 | 5  | 18 | 0 | - | 21 | 6  | 15 | 0 | 116742.499 | 0.030 | 0.051  |        |
| 447: | 16 | 0  | 16 | 1 | - | 15 | 0  | 15 | 0 | 157827.080 | 0.010 | 0.016  |        |
| 448: | 20 | 1  | 20 | 1 | - | 19 | 1  | 19 | 0 | 194695.051 | 0.010 | 0.014  |        |
| 449: | 20 | 0  | 20 | 1 | - | 19 | 0  | 19 | 0 | 194697.921 | 0.010 | 0.014  |        |
| 450: | 27 | 3  | 25 | 1 | - | 26 | 3  | 24 | 0 | 272023.564 | 0.005 | -0.002 |        |
| 451: | 27 | 2  | 25 | 1 | - | 26 | 2  | 24 | 0 | 272100.077 | 0.010 | 0.006  |        |
| 452: | 27 | 8  | 20 | 0 | - | 26 | 8  | 19 | 1 | 272484.537 | 0.010 | 0.004  |        |
| 453: | 30 | 1  | 30 | 0 | - | 29 | 1  | 29 | 1 | 272572.822 | 0.010 | 0.010  | 0.5625 |
| 454: | 30 | 0  | 30 | 0 | - | 29 | 0  | 29 | 1 | 272572.822 | 0.010 | 0.010  | 0.4375 |
| 455: | 26 | 16 | 11 | 1 | - | 25 | 16 | 10 | 0 | 272875.160 | 0.010 | -0.012 | 0.4375 |
| 456: | 26 | 16 | 10 | 1 | - | 25 | 16 | 9  | 0 | 272875.160 | 0.010 | -0.012 | 0.5625 |
| 457: | 26 | 15 | 12 | 1 | - | 25 | 15 | 11 | 0 | 272882.375 | 0.010 | -0.006 | 0.4375 |
| 458: | 26 | 15 | 11 | 1 | - | 25 | 15 | 10 | 0 | 272882.375 | 0.010 | -0.006 | 0.5625 |
| 459: | 26 | 17 | 10 | 1 | - | 25 | 17 | 9  | 0 | 272894.412 | 0.030 | -0.003 | 0.4375 |
| 460: | 26 | 17 | 9  | 1 | - | 25 | 17 | 8  | 0 | 272894.412 | 0.030 | -0.003 | 0.5625 |
| 461: | 26 | 14 | 13 | 1 | - | 25 | 14 | 12 | 0 | 272921.870 | 0.010 | 0.006  | 0.4375 |
| 462: | 26 | 14 | 12 | 1 | - | 25 | 14 | 11 | 0 | 272921.870 | 0.010 | 0.006  | 0.5625 |
| 463: | 26 | 18 | 9  | 1 | - | 25 | 18 | 8  | 0 | 272935.923 | 0.010 | -0.008 | 0.4375 |
| 464: | 26 | 18 | 8  | 1 | - | 25 | 18 | 7  | 0 | 272935.923 | 0.010 | -0.008 | 0.5625 |
| 465: | 26 | 19 | 8  | 1 | - | 25 | 19 | 7  | 0 | 272996.653 | 0.020 | -0.007 | 0.4375 |
| 466: | 26 | 19 | 7  | 1 | - | 25 | 19 | 6  | 0 | 272996.653 | 0.020 | -0.007 | 0.5625 |
| 467: | 26 | 13 | 14 | 1 | - | 25 | 13 | 13 | 0 | 273001.932 | 0.010 | 0.011  | 0.4375 |
| 468: | 26 | 13 | 13 | 1 | - | 25 | 13 | 12 | 0 | 273001.932 | 0.010 | 0.011  | 0.5625 |



|      |    |    |    |   |   |    |    |    |   |            |       |        |        |
|------|----|----|----|---|---|----|----|----|---|------------|-------|--------|--------|
| 469: | 26 | 20 | 7  | 1 | - | 25 | 20 | 6  | 0 | 273074.309 | 0.020 | -0.020 | 0.4375 |
| 470: | 26 | 20 | 6  | 1 | - | 25 | 20 | 5  | 0 | 273074.309 | 0.020 | -0.020 | 0.5625 |
| 471: | 26 | 12 | 15 | 1 | - | 25 | 12 | 14 | 0 | 273134.755 | 0.010 | 0.005  | 0.4375 |
| 472: | 26 | 12 | 14 | 1 | - | 25 | 12 | 13 | 0 | 273134.755 | 0.010 | 0.005  | 0.5625 |
| 473: | 26 | 11 | 16 | 1 | - | 25 | 11 | 15 | 0 | 273338.971 | 0.010 | 0.018  | 0.4375 |
| 474: | 26 | 11 | 15 | 1 | - | 25 | 11 | 14 | 0 | 273338.971 | 0.010 | 0.018  | 0.5625 |
| 475: | 28 | 2  | 27 | 1 | - | 27 | 2  | 26 | 0 | 274778.739 | 0.010 | 0.001  |        |
| 476: | 28 | 1  | 27 | 1 | - | 27 | 1  | 26 | 0 | 274780.652 | 0.010 | -0.006 |        |
| 477: | 29 | 3  | 27 | 0 | - | 28 | 3  | 26 | 1 | 276546.485 | 0.010 | -0.021 |        |
| 478: | 29 | 2  | 27 | 0 | - | 28 | 2  | 26 | 1 | 276572.297 | 0.010 | -0.015 |        |
| 479: | 29 | 1  | 29 | 1 | - | 28 | 1  | 28 | 0 | 277620.484 | 0.010 | -0.000 | 0.5625 |
| 480: | 29 | 0  | 29 | 1 | - | 28 | 0  | 28 | 0 | 277620.484 | 0.010 | -0.000 | 0.4375 |
| 481: | 28 | 25 | 3  | 0 | - | 27 | 25 | 2  | 1 | 279578.490 | 0.020 | -0.040 | 0.4375 |
| 482: | 28 | 25 | 4  | 0 | - | 27 | 25 | 3  | 1 | 279578.490 | 0.020 | -0.040 | 0.5625 |
| 483: | 28 | 24 | 4  | 0 | - | 27 | 24 | 3  | 1 | 279618.103 | 0.020 | -0.014 | 0.4375 |
| 484: | 28 | 24 | 5  | 0 | - | 27 | 24 | 4  | 1 | 279618.103 | 0.020 | -0.014 | 0.5625 |
| 485: | 28 | 23 | 5  | 0 | - | 27 | 23 | 4  | 1 | 279660.151 | 0.010 | -0.007 | 0.4375 |
| 486: | 28 | 23 | 6  | 0 | - | 27 | 23 | 5  | 1 | 279660.151 | 0.010 | -0.007 | 0.5625 |
| 487: | 30 | 0  | 30 | 0 | - | 29 | 1  | 29 | 0 | 279693.378 | 0.010 | 0.008  | 0.4375 |
| 488: | 30 | 1  | 30 | 0 | - | 29 | 0  | 29 | 0 | 279693.378 | 0.010 | 0.008  | 0.5625 |
| 489: | 28 | 22 | 6  | 0 | - | 27 | 22 | 5  | 1 | 279705.653 | 0.040 | -0.028 | 0.4375 |
| 490: | 28 | 22 | 7  | 0 | - | 27 | 22 | 6  | 1 | 279705.653 | 0.040 | -0.028 | 0.5625 |
| 491: | 30 | 0  | 30 | 1 | - | 29 | 1  | 29 | 1 | 279706.642 | 0.030 | 0.015  | 0.5625 |
| 492: | 30 | 1  | 30 | 1 | - | 29 | 0  | 29 | 1 | 279706.642 | 0.030 | 0.015  | 0.4375 |
| 493: | 28 | 21 | 7  | 0 | - | 27 | 21 | 6  | 1 | 279755.946 | 0.020 | 0.040  | 0.4375 |
| 494: | 28 | 21 | 8  | 0 | - | 27 | 21 | 7  | 1 | 279755.946 | 0.020 | 0.040  | 0.5625 |
| 495: | 28 | 20 | 8  | 0 | - | 27 | 20 | 7  | 1 | 279812.290 | 0.020 | -0.015 | 0.4375 |
| 496: | 28 | 20 | 9  | 0 | - | 27 | 20 | 8  | 1 | 279812.290 | 0.020 | -0.015 | 0.5625 |
| 497: | 28 | 19 | 9  | 0 | - | 27 | 19 | 8  | 1 | 279876.671 | 0.010 | -0.021 | 0.4375 |
| 498: | 28 | 19 | 10 | 0 | - | 27 | 19 | 9  | 1 | 279876.671 | 0.010 | -0.021 | 0.5625 |
| 499: | 28 | 18 | 10 | 0 | - | 27 | 18 | 9  | 1 | 279951.376 | 0.020 | 0.029  | 0.4375 |
| 500: | 28 | 18 | 11 | 0 | - | 27 | 18 | 10 | 1 | 279951.376 | 0.020 | 0.029  | 0.5625 |
| 501: | 28 | 5  | 24 | 0 | - | 27 | 5  | 23 | 1 | 280863.326 | 0.010 | -0.003 |        |
| 502: | 31 | 1  | 31 | 0 | - | 30 | 1  | 30 | 1 | 281750.779 | 0.010 | 0.017  | 0.4375 |
| 503: | 31 | 0  | 31 | 0 | - | 30 | 0  | 30 | 1 | 281750.779 | 0.010 | 0.017  | 0.5625 |
| 504: | 27 | 18 | 9  | 1 | - | 26 | 18 | 8  | 0 | 283122.627 | 0.010 | -0.013 | 0.4375 |
| 505: | 27 | 18 | 10 | 1 | - | 26 | 18 | 9  | 0 | 283122.627 | 0.010 | -0.013 | 0.5625 |
| 506: | 28 | 7  | 21 | 0 | - | 27 | 7  | 20 | 1 | 285084.746 | 0.010 | 0.005  |        |
| 507: | 29 | 4  | 25 | 1 | - | 28 | 5  | 24 | 1 | 286506.824 | 0.010 | -0.009 |        |
| 508: | 30 | 1  | 30 | 1 | - | 29 | 1  | 29 | 0 | 286827.174 | 0.005 | -0.010 | 0.4375 |
| 509: | 30 | 0  | 30 | 1 | - | 29 | 0  | 29 | 0 | 286827.174 | 0.005 | -0.010 | 0.5625 |
| 510: | 28 | 7  | 22 | 1 | - | 27 | 7  | 20 | 1 | 287571.036 | 0.010 | -0.008 |        |
| 511: | 31 | 0  | 31 | 0 | - | 30 | 1  | 30 | 0 | 288884.578 | 0.010 | 0.002  | 0.5625 |
| 512: | 31 | 1  | 31 | 0 | - | 30 | 0  | 30 | 0 | 288884.578 | 0.010 | 0.002  | 0.4375 |
| 513: | 31 | 0  | 31 | 1 | - | 30 | 1  | 30 | 1 | 288898.381 | 0.020 | 0.012  | 0.4375 |
| 514: | 31 | 1  | 31 | 1 | - | 30 | 0  | 30 | 1 | 288898.381 | 0.020 | 0.012  | 0.5625 |
| 515: | 29 | 5  | 25 | 0 | - | 28 | 5  | 24 | 1 | 290826.057 | 0.010 | 0.006  |        |
| 516: | 32 | 1  | 32 | 0 | - | 31 | 1  | 31 | 1 | 290925.871 | 0.010 | -0.004 | 0.5625 |
| 517: | 32 | 0  | 32 | 0 | - | 31 | 0  | 31 | 1 | 290925.871 | 0.010 | -0.004 | 0.4375 |
| 518: | 42 | 15 | 27 | 0 | - | 42 | 14 | 28 | 0 | 291924.026 | 0.040 | -0.038 | 0.4372 |
| 519: | 42 | 15 | 28 | 0 | - | 42 | 14 | 29 | 0 | 291924.026 | 0.040 | -0.038 | 0.5628 |
| 520: | 29 | 10 | 20 | 0 | - | 28 | 10 | 19 | 1 | 292114.241 | 0.030 | -0.013 |        |
| 521: | 29 | 10 | 19 | 0 | - | 28 | 10 | 18 | 1 | 292115.939 | 0.030 | -0.013 |        |
| 522: | 30 | 3  | 28 | 1 | - | 29 | 2  | 27 | 1 | 292704.446 | 0.030 | -0.004 |        |
| 523: | 15 | 7  | 9  | 1 | - | 14 | 6  | 9  | 0 | 293060.527 | 0.040 | 0.024  |        |
| 524: | 30 | 2  | 29 | 1 | - | 29 | 2  | 28 | 0 | 293177.329 | 0.040 | -0.003 |        |
| 525: | 30 | 1  | 29 | 1 | - | 29 | 1  | 28 | 0 | 293178.044 | 0.040 | 0.048  |        |
| 526: | 28 | 18 | 10 | 1 | - | 27 | 18 | 9  | 0 | 293308.429 | 0.030 | -0.014 | 0.5618 |
| 527: | 28 | 18 | 11 | 1 | - | 27 | 18 | 10 | 0 | 293308.429 | 0.030 | -0.014 | 0.4382 |
| 528: | 29 | 4  | 25 | 0 | - | 28 | 4  | 24 | 1 | 293321.161 | 0.020 | 0.026  |        |
| 529: | 28 | 13 | 16 | 1 | - | 27 | 13 | 15 | 0 | 293506.589 | 0.015 | 0.012  | 0.4374 |

|      |    |    |    |   |   |    |    |    |   |            |       |        |        |
|------|----|----|----|---|---|----|----|----|---|------------|-------|--------|--------|
| 530: | 28 | 13 | 15 | 1 | - | 27 | 13 | 14 | 0 | 293506.589 | 0.015 | 0.012  | 0.5626 |
| 531: | 29 | 7  | 23 | 0 | - | 28 | 7  | 22 | 1 | 293930.936 | 0.010 | 0.013  |        |
| 532: | 28 | 7  | 21 | 0 | - | 27 | 7  | 21 | 0 | 294608.982 | 0.020 | 0.015  |        |
| 533: | 29 | 7  | 23 | 1 | - | 28 | 7  | 21 | 1 | 294858.737 | 0.020 | 0.046  |        |
| 534: | 19 | 6  | 13 | 0 | - | 18 | 5  | 13 | 1 | 296128.230 | 0.060 | -0.003 |        |
| 535: | 28 | 4  | 24 | 1 | - | 27 | 4  | 23 | 0 | 296284.225 | 0.010 | -0.011 |        |
| 536: | 29 | 7  | 23 | 0 | - | 28 | 7  | 21 | 0 | 296417.227 | 0.030 | 0.001  |        |
| 537: | 28 | 7  | 22 | 1 | - | 27 | 7  | 21 | 0 | 297095.276 | 0.005 | 0.006  |        |
| 538: | 30 | 5  | 26 | 0 | - | 29 | 5  | 25 | 1 | 297483.131 | 0.010 | 0.010  |        |
| 539: | 29 | 7  | 22 | 0 | - | 28 | 7  | 21 | 1 | 297759.963 | 0.010 | -0.003 |        |
| 540: | 30 | 4  | 26 | 0 | - | 29 | 5  | 25 | 0 | 298174.705 | 0.010 | 0.004  |        |
| 541: | 30 | 4  | 26 | 1 | - | 29 | 5  | 25 | 1 | 301091.201 | 0.010 | -0.002 |        |
| 542: | 31 | 4  | 28 | 0 | - | 30 | 4  | 27 | 1 | 301574.229 | 0.010 | -0.001 |        |
| 543: | 29 | 5  | 25 | 1 | - | 28 | 5  | 24 | 0 | 301591.762 | 0.020 | -0.006 |        |
| 544: | 30 | 4  | 26 | 0 | - | 29 | 4  | 25 | 1 | 302493.913 | 0.010 | -0.006 |        |
| 545: | 28 | 5  | 24 | 0 | - | 27 | 4  | 23 | 0 | 302829.739 | 0.010 | -0.001 |        |
| 546: | 30 | 7  | 24 | 0 | - | 29 | 7  | 22 | 0 | 302903.434 | 0.030 | 0.033  |        |
| 547: | 29 | 4  | 25 | 1 | - | 28 | 4  | 24 | 0 | 304482.440 | 0.030 | -0.001 |        |
| 548: | 30 | 7  | 24 | 0 | - | 29 | 7  | 23 | 1 | 305804.671 | 0.010 | -0.005 |        |
| 549: | 29 | 7  | 23 | 1 | - | 28 | 7  | 22 | 0 | 306148.539 | 0.010 | -0.002 |        |
| 550: | 29 | 7  | 22 | 1 | - | 28 | 7  | 22 | 1 | 307790.500 | 0.020 | 0.030  |        |
| 551: | 31 | 3  | 28 | 1 | - | 30 | 4  | 27 | 1 | 308131.426 | 0.010 | -0.008 |        |
| 552: | 31 | 4  | 27 | 0 | - | 30 | 4  | 26 | 1 | 308482.313 | 0.010 | 0.013  |        |
| 553: | 29 | 5  | 25 | 0 | - | 28 | 4  | 24 | 0 | 308801.662 | 0.010 | 0.003  |        |
| 554: | 30 | 7  | 23 | 0 | - | 29 | 7  | 22 | 1 | 308863.315 | 0.010 | -0.011 |        |
| 555: | 29 | 7  | 22 | 0 | - | 28 | 7  | 22 | 0 | 309049.809 | 0.010 | -0.007 |        |
| 556: | 32 | 5  | 27 | 1 | - | 31 | 6  | 26 | 1 | 309230.606 | 0.020 | -0.020 |        |
| 557: | 34 | 1  | 34 | 0 | - | 33 | 1  | 33 | 1 | 309267.296 | 0.010 | 0.021  | 0.5625 |
| 558: | 34 | 0  | 34 | 0 | - | 33 | 0  | 33 | 1 | 309267.296 | 0.010 | 0.021  | 0.4375 |
| 559: | 36 | 16 | 20 | 0 | - | 36 | 15 | 22 | 1 | 309303.773 | 0.040 | -0.060 | 0.4374 |
| 560: | 36 | 16 | 21 | 0 | - | 36 | 15 | 21 | 1 | 309303.773 | 0.040 | -0.060 | 0.5626 |
| 561: | 20 | 5  | 15 | 0 | - | 19 | 4  | 16 | 0 | 309305.995 | 0.020 | -0.010 |        |
| 562: | 29 | 7  | 22 | 1 | - | 28 | 7  | 21 | 0 | 310276.821 | 0.020 | 0.048  |        |
| 563: | 31 | 4  | 27 | 0 | - | 30 | 5  | 26 | 0 | 312090.394 | 0.020 | 0.012  |        |
| 564: | 33 | 1  | 33 | 1 | - | 32 | 1  | 32 | 0 | 314436.798 | 0.010 | 0.002  | 0.5625 |
| 565: | 33 | 0  | 33 | 1 | - | 32 | 0  | 32 | 0 | 314436.798 | 0.010 | 0.002  | 0.4375 |
| 566: | 30 | 5  | 26 | 1 | - | 29 | 4  | 25 | 1 | 314903.644 | 0.020 | -0.002 |        |
| 567: | 31 | 8  | 24 | 0 | - | 30 | 8  | 23 | 1 | 314923.118 | 0.020 | -0.006 |        |
| 568: | 31 | 8  | 23 | 0 | - | 30 | 8  | 22 | 1 | 315671.326 | 0.020 | 0.005  |        |
| 569: | 34 | 2  | 33 | 0 | - | 33 | 2  | 32 | 1 | 315813.190 | 0.020 | -0.015 | 0.5625 |
| 570: | 34 | 1  | 33 | 0 | - | 33 | 1  | 32 | 1 | 315813.190 | 0.020 | -0.015 | 0.4375 |
| 571: | 31 | 7  | 25 | 0 | - | 30 | 7  | 24 | 1 | 315892.110 | 0.010 | 0.002  |        |
| 572: | 30 | 9  | 21 | 1 | - | 29 | 9  | 20 | 0 | 315961.887 | 0.030 | 0.012  |        |
| 573: | 30 | 16 | 14 | 0 | - | 30 | 15 | 15 | 0 | 316320.117 | 0.020 | -0.022 | 0.4375 |
| 574: | 30 | 16 | 15 | 0 | - | 30 | 15 | 16 | 0 | 316320.117 | 0.020 | -0.022 | 0.5625 |
| 575: | 30 | 16 | 15 | 1 | - | 30 | 15 | 16 | 1 | 316364.496 | 0.030 | -0.045 | 0.4375 |
| 576: | 30 | 16 | 14 | 1 | - | 30 | 15 | 15 | 1 | 316364.496 | 0.030 | -0.045 | 0.5625 |
| 577: | 20 | 6  | 14 | 0 | - | 19 | 5  | 15 | 0 | 316698.077 | 0.030 | 0.010  |        |
| 578: | 30 | 7  | 24 | 1 | - | 29 | 7  | 23 | 0 | 316868.229 | 0.010 | -0.009 |        |
| 579: | 31 | 5  | 27 | 1 | - | 30 | 4  | 26 | 1 | 319122.963 | 0.010 | 0.008  |        |
| 580: | 30 | 7  | 23 | 1 | - | 29 | 7  | 22 | 0 | 320352.195 | 0.020 | 0.032  |        |
| 581: | 32 | 25 | 7  | 0 | - | 31 | 25 | 6  | 1 | 320725.842 | 0.030 | 0.062  | 0.4375 |
| 582: | 32 | 25 | 8  | 0 | - | 31 | 25 | 7  | 1 | 320725.842 | 0.030 | 0.062  | 0.5625 |
| 583: | 33 | 2  | 32 | 1 | - | 32 | 2  | 31 | 0 | 320762.641 | 0.020 | -0.001 | 0.5625 |
| 584: | 33 | 1  | 32 | 1 | - | 32 | 1  | 31 | 0 | 320762.641 | 0.020 | -0.001 | 0.4375 |
| 585: | 32 | 24 | 8  | 0 | - | 31 | 24 | 7  | 1 | 320764.991 | 0.030 | 0.042  | 0.4375 |
| 586: | 32 | 24 | 9  | 0 | - | 31 | 24 | 8  | 1 | 320764.991 | 0.030 | 0.042  | 0.5625 |
| 587: | 32 | 23 | 9  | 0 | - | 31 | 23 | 8  | 1 | 320809.295 | 0.010 | 0.024  | 0.4375 |
| 588: | 32 | 23 | 10 | 0 | - | 31 | 23 | 9  | 1 | 320809.295 | 0.010 | 0.024  | 0.5625 |
| 589: | 32 | 22 | 10 | 0 | - | 31 | 22 | 9  | 1 | 320860.172 | 0.010 | -0.001 | 0.4375 |
| 590: | 32 | 22 | 11 | 0 | - | 31 | 22 | 10 | 1 | 320860.172 | 0.010 | -0.001 | 0.5625 |

|      |    |    |    |   |   |    |    |    |   |            |       |        |        |
|------|----|----|----|---|---|----|----|----|---|------------|-------|--------|--------|
| 591: | 32 | 21 | 11 | 0 | - | 31 | 21 | 10 | 1 | 320919.361 | 0.010 | -0.006 | 0.4375 |
| 592: | 32 | 21 | 12 | 0 | - | 31 | 21 | 11 | 1 | 320919.361 | 0.010 | -0.006 | 0.5625 |
| 593: | 32 | 20 | 12 | 0 | - | 31 | 20 | 11 | 1 | 320988.936 | 0.020 | -0.014 | 0.4375 |
| 594: | 32 | 20 | 13 | 0 | - | 31 | 20 | 12 | 1 | 320988.936 | 0.020 | -0.014 | 0.5625 |
| 595: | 32 | 19 | 13 | 0 | - | 31 | 19 | 12 | 1 | 321071.519 | 0.020 | -0.015 | 0.4375 |
| 596: | 32 | 19 | 14 | 0 | - | 31 | 19 | 13 | 1 | 321071.519 | 0.020 | -0.015 | 0.5625 |
| 597: | 32 | 18 | 14 | 0 | - | 31 | 18 | 13 | 1 | 321170.432 | 0.010 | -0.007 | 0.4375 |
| 598: | 32 | 18 | 15 | 0 | - | 31 | 18 | 14 | 1 | 321170.432 | 0.010 | -0.007 | 0.5625 |
| 599: | 32 | 17 | 15 | 0 | - | 31 | 17 | 14 | 1 | 321289.948 | 0.020 | -0.015 | 0.4375 |
| 600: | 32 | 17 | 16 | 0 | - | 31 | 17 | 15 | 1 | 321289.948 | 0.020 | -0.015 | 0.5625 |
| 601: | 32 | 16 | 16 | 0 | - | 31 | 16 | 15 | 1 | 321435.807 | 0.020 | 0.013  | 0.4375 |
| 602: | 32 | 16 | 17 | 0 | - | 31 | 16 | 16 | 1 | 321435.807 | 0.020 | 0.013  | 0.5625 |
| 603: | 32 | 15 | 17 | 0 | - | 31 | 15 | 16 | 1 | 321615.639 | 0.020 | -0.003 | 0.4375 |
| 604: | 32 | 15 | 18 | 0 | - | 31 | 15 | 17 | 1 | 321615.639 | 0.020 | -0.003 | 0.5625 |
| 605: | 32 | 14 | 18 | 0 | - | 31 | 14 | 17 | 1 | 321840.239 | 0.020 | -0.004 | 0.4375 |
| 606: | 32 | 14 | 19 | 0 | - | 31 | 14 | 18 | 1 | 321840.239 | 0.020 | -0.004 | 0.5625 |
| 607: | 30 | 7  | 23 | 1 | - | 29 | 7  | 23 | 1 | 323253.435 | 0.010 | -0.003 |        |
| 608: | 32 | 6  | 27 | 0 | - | 31 | 6  | 26 | 1 | 323690.575 | 0.020 | -0.003 |        |
| 609: | 31 | 18 | 13 | 1 | - | 30 | 18 | 12 | 0 | 323861.051 | 0.020 | 0.016  | 0.4375 |
| 610: | 31 | 18 | 14 | 1 | - | 30 | 18 | 13 | 0 | 323861.051 | 0.020 | 0.016  | 0.5625 |
| 611: | 31 | 17 | 14 | 1 | - | 30 | 17 | 13 | 0 | 323864.573 | 0.010 | 0.003  | 0.4375 |
| 612: | 31 | 17 | 15 | 1 | - | 30 | 17 | 14 | 0 | 323864.573 | 0.010 | 0.003  | 0.5625 |
| 613: | 31 | 19 | 12 | 1 | - | 30 | 19 | 11 | 0 | 323885.574 | 0.020 | 0.004  | 0.4375 |
| 614: | 31 | 19 | 13 | 1 | - | 30 | 19 | 12 | 0 | 323885.574 | 0.020 | 0.004  | 0.5625 |
| 615: | 31 | 16 | 15 | 1 | - | 30 | 16 | 14 | 0 | 323901.524 | 0.010 | -0.005 | 0.4375 |
| 616: | 31 | 16 | 16 | 1 | - | 30 | 16 | 15 | 0 | 323901.524 | 0.010 | -0.005 | 0.5625 |
| 617: | 31 | 20 | 11 | 1 | - | 30 | 20 | 10 | 0 | 323934.223 | 0.030 | 0.028  | 0.4375 |
| 618: | 31 | 20 | 12 | 1 | - | 30 | 20 | 11 | 0 | 323934.223 | 0.030 | 0.028  | 0.5625 |
| 619: | 31 | 15 | 16 | 1 | - | 30 | 15 | 15 | 0 | 323979.233 | 0.010 | -0.014 | 0.4375 |
| 620: | 31 | 15 | 17 | 1 | - | 30 | 15 | 16 | 0 | 323979.233 | 0.010 | -0.014 | 0.5625 |
| 621: | 31 | 21 | 10 | 1 | - | 30 | 21 | 9  | 0 | 324003.952 | 0.020 | 0.050  | 0.4375 |
| 622: | 31 | 21 | 11 | 1 | - | 30 | 21 | 10 | 0 | 324003.952 | 0.020 | 0.050  | 0.5625 |
| 623: | 31 | 14 | 17 | 1 | - | 30 | 14 | 16 | 0 | 324107.994 | 0.010 | -0.009 | 0.4375 |
| 624: | 31 | 14 | 18 | 1 | - | 30 | 14 | 17 | 0 | 324107.994 | 0.010 | -0.009 | 0.5625 |
| 625: | 32 | 7  | 26 | 0 | - | 31 | 7  | 25 | 1 | 326128.532 | 0.020 | 0.029  |        |
| 626: | 33 | 3  | 30 | 0 | - | 32 | 4  | 29 | 0 | 326644.384 | 0.040 | -0.052 |        |
| 627: | 49 | 9  | 41 | 1 | - | 48 | 10 | 39 | 0 | 326656.818 | 0.060 | 0.137  |        |
| 628: | 23 | 6  | 17 | 0 | - | 22 | 5  | 17 | 1 | 327181.454 | 0.020 | -0.012 |        |
| 629: | 17 | 8  | 10 | 0 | - | 16 | 7  | 9  | 0 | 327183.449 | 0.015 | 0.015  |        |
| 630: | 31 | 7  | 25 | 1 | - | 30 | 7  | 24 | 0 | 327291.012 | 0.010 | -0.004 |        |
| 631: | 36 | 1  | 36 | 0 | - | 35 | 1  | 35 | 1 | 327596.365 | 0.020 | -0.007 | 0.5622 |
| 632: | 36 | 0  | 36 | 0 | - | 35 | 0  | 35 | 1 | 327596.365 | 0.020 | -0.007 | 0.4378 |
| 633: | 34 | 4  | 31 | 0 | - | 33 | 4  | 30 | 1 | 329062.502 | 0.010 | -0.001 |        |
| 634: | 34 | 3  | 31 | 0 | - | 33 | 3  | 30 | 1 | 329104.365 | 0.020 | 0.007  |        |
| 635: | 34 | 2  | 33 | 1 | - | 33 | 2  | 32 | 0 | 329954.040 | 0.010 | 0.010  | 0.4375 |
| 636: | 34 | 1  | 33 | 1 | - | 33 | 1  | 32 | 0 | 329954.040 | 0.010 | 0.010  | 0.5625 |
| 637: | 35 | 1  | 35 | 1 | - | 34 | 1  | 34 | 0 | 332833.735 | 0.010 | -0.001 | 0.4375 |
| 638: | 35 | 0  | 35 | 1 | - | 34 | 0  | 34 | 0 | 332833.735 | 0.010 | -0.001 | 0.5625 |
| 639: | 24 | 6  | 18 | 0 | - | 23 | 5  | 18 | 1 | 333269.754 | 0.015 | 0.006  |        |
| 640: | 33 | 6  | 28 | 0 | - | 32 | 6  | 27 | 1 | 333486.487 | 0.020 | 0.005  |        |
| 641: | 33 | 4  | 30 | 1 | - | 32 | 4  | 29 | 0 | 333636.056 | 0.020 | -0.003 |        |
| 642: | 33 | 3  | 30 | 1 | - | 32 | 3  | 29 | 0 | 333714.989 | 0.010 | -0.014 |        |
| 643: | 28 | 17 | 11 | 0 | - | 28 | 16 | 12 | 0 | 337019.546 | 0.025 | -0.035 | 0.4375 |
| 644: | 28 | 17 | 12 | 0 | - | 28 | 16 | 13 | 0 | 337019.546 | 0.025 | -0.035 | 0.5625 |
| 645: | 32 | 5  | 27 | 1 | - | 31 | 5  | 26 | 0 | 341088.524 | 0.020 | -0.037 |        |
| 646: | 25 | 6  | 19 | 0 | - | 24 | 5  | 19 | 1 | 341865.836 | 0.030 | 0.021  |        |
| 647: | 36 | 1  | 36 | 1 | - | 35 | 1  | 35 | 0 | 342029.188 | 0.020 | 0.041  | 0.4375 |
| 648: | 36 | 0  | 36 | 1 | - | 35 | 0  | 35 | 0 | 342029.188 | 0.020 | 0.041  | 0.5625 |
| 649: | 31 | 17 | 14 | 1 | - | 31 | 16 | 16 | 0 | 343214.298 | 0.030 | -0.021 | 0.4374 |
| 650: | 31 | 17 | 15 | 1 | - | 31 | 16 | 15 | 0 | 343214.298 | 0.030 | -0.021 | 0.5626 |
| 651: | 34 | 6  | 29 | 0 | - | 33 | 6  | 28 | 1 | 343293.975 | 0.010 | 0.003  |        |

|      |    |   |    |   |   |    |   |    |   |            |       |        |        |
|------|----|---|----|---|---|----|---|----|---|------------|-------|--------|--------|
| 652: | 37 | 2 | 36 | 0 | - | 36 | 2 | 35 | 1 | 343300.723 | 0.010 | -0.014 | 0.4375 |
| 653: | 37 | 1 | 36 | 0 | - | 36 | 1 | 35 | 1 | 343300.723 | 0.010 | -0.014 | 0.5625 |
| 654: | 33 | 6 | 28 | 1 | - | 32 | 6 | 27 | 0 | 344538.021 | 0.020 | -0.016 |        |
| 655: | 34 | 8 | 27 | 0 | - | 33 | 8 | 26 | 1 | 345832.886 | 0.010 | -0.007 |        |
| 656: | 38 | 0 | 38 | 0 | - | 37 | 0 | 37 | 1 | 345912.524 | 0.005 | -0.002 | 0.4375 |
| 657: | 38 | 1 | 38 | 0 | - | 37 | 1 | 37 | 1 | 345912.524 | 0.005 | -0.002 | 0.5625 |
| 658: | 34 | 8 | 27 | 1 | - | 33 | 8 | 25 | 1 | 346393.793 | 0.030 | -0.014 |        |
| 659: | 34 | 7 | 28 | 0 | - | 33 | 7 | 27 | 1 | 346462.657 | 0.020 | 0.002  |        |
| 660: | 34 | 5 | 29 | 0 | - | 33 | 5 | 28 | 1 | 346630.908 | 0.010 | 0.030  |        |
| 661: | 33 | 8 | 25 | 0 | - | 32 | 8 | 25 | 0 | 346861.495 | 0.010 | 0.008  |        |
| 662: | 19 | 8 | 12 | 1 | - | 18 | 7 | 11 | 1 | 347298.288 | 0.020 | -0.001 |        |
| 663: | 35 | 4 | 31 | 0 | - | 34 | 5 | 30 | 0 | 351056.047 | 0.010 | -0.008 |        |
| 664: | 35 | 4 | 31 | 1 | - | 34 | 5 | 30 | 1 | 351060.445 | 0.040 | -0.047 |        |
| 665: | 23 | 6 | 17 | 0 | - | 22 | 5 | 18 | 0 | 351443.117 | 0.015 | -0.019 |        |
| 666: | 38 | 2 | 37 | 0 | - | 37 | 1 | 36 | 0 | 359571.012 | 0.020 | -0.009 |        |
| 667: | 24 | 6 | 19 | 1 | - | 23 | 5 | 19 | 0 | 366237.520 | 0.020 | 0.002  |        |
